# Supplementary material for: Pregnancy alters fatty acid metabolism, glucose regulation, and detoxification of the liver in synchrony with biomechanical property changes
Source: PubMed Central journal article supplement (PMC11538949; doi:10.1016/j.heliyon.2024.e39674), 2024-10-22

Pregnancy alters fatty acid metabolism, glucose regulation, and detoxification of the liver  
in synchrony with biomechanical property changes

Jing Guo, Karolina Krehl, Yasmine Safraou, Iwona Wallach, Jürgen Braun, David Meierhofer, Ingolf Sack, Nikolaus Berndt

**\*Corresponding author**

Nikolaus Berndt

German Institute of Human Nutrition Potsdam-Rehbruecke (DIfE), Dept. of Molecular Toxicology

Arthur-Scheunert-Allee 114-116 | 14558 Nuthetal, Germany

Phone: + 49 33 200 88 - 2365 | e-mail: [nikolaus.berndt@dife.de](mailto:nikolaus.berndt@dife.de)

**Table of Contents**

|                                                           |    |
|-----------------------------------------------------------|----|
| Supplementary Tables.....                                 | 3  |
| Table S1 .....                                            | 3  |
| Supplementary Figures.....                                | 5  |
| Supplementary Fig. S1 Capacity-Protein Correlations ..... | 5  |
| (A) Ethanol detoxification.....                           | 5  |
| (B) Fatty acid utilization.....                           | 6  |
| (C) Fatty acid utilization.....                           | 6  |
| (D) Fatty acid utilization .....                          | 7  |
| (E) Fatty acid utilization .....                          | 7  |
| (F) Triacylglycerol (TAG) synthesis.....                  | 8  |
| (G) TAG synthesis.....                                    | 8  |
| (H) TAG synthesis.....                                    | 9  |
| (I) TAG synthesis .....                                   | 9  |
| (J) Lipoprotein synthesis.....                            | 10 |
| (K) Fructose metabolism .....                             | 10 |
| (L) Fructose metabolism.....                              | 11 |
| (M) Fructose metabolism .....                             | 11 |
| (N) Glycerol uptake.....                                  | 12 |
| (O) Urea synthesis .....                                  | 12 |
| (P) Urea synthesis.....                                   | 13 |
| (Q) Urea synthesis .....                                  | 13 |
| (R) Urea synthesis.....                                   | 14 |
| (S) Urea synthesis .....                                  | 14 |

## Supplemental Information

|                                                                                                                                       |    |
|---------------------------------------------------------------------------------------------------------------------------------------|----|
| Supplementary Fig. S2 Correlations between the biophysical properties and the metabolic functions under physiological conditions..... | 15 |
| (A) Urea production.....                                                                                                              | 15 |
| (B) TAG synthesis.....                                                                                                                | 16 |
| (C) TAG storage.....                                                                                                                  | 16 |
| (D) Ammonia uptake .....                                                                                                              | 17 |
| (E) Ketone body production .....                                                                                                      | 17 |
| (F) Gluconeogenesis .....                                                                                                             | 18 |
| (G) Glucose uptake .....                                                                                                              | 18 |
| (H) Glutamate exchange.....                                                                                                           | 19 |
| (I) Glutamine exchange .....                                                                                                          | 19 |
| (J) Fatty acid uptake .....                                                                                                           | 20 |
| (K) Fatty acid synthesis .....                                                                                                        | 20 |
| (L) Cholesterol synthesis.....                                                                                                        | 21 |
| (M) Beta-oxidation .....                                                                                                              | 21 |
| (N) Very-low-density lipoprotein (VLDL) production .....                                                                              | 22 |
| (O) Acetoacetate production.....                                                                                                      | 22 |
| (P) Beta-hydroxybutyrate production .....                                                                                             | 23 |
| Supplementary Fig. S3 Correlations between the biophysical properties and the metabolic functions – Maximal capacities .....          | 23 |
| (A) Ethanol uptake.....                                                                                                               | 24 |
| (B) Acetoacetate production .....                                                                                                     | 24 |
| (C) Beta-hydroxybutyrate production .....                                                                                             | 25 |
| (D) Fatty acid uptake .....                                                                                                           | 25 |
| (E) Ketone body uptake .....                                                                                                          | 26 |
| (F) TAG storage .....                                                                                                                 | 26 |
| (G) TAG synthesis.....                                                                                                                | 27 |
| (H) VLDL production .....                                                                                                             | 27 |
| (I) Fructose uptake .....                                                                                                             | 28 |
| (J) Galactose uptake .....                                                                                                            | 28 |
| (K) Glycerol uptake .....                                                                                                             | 29 |
| (L) Gluconeogenesis .....                                                                                                             | 29 |
| (M) Ammonia uptake .....                                                                                                              | 30 |
| (N) Urea production .....                                                                                                             | 30 |

## Supplementary Tables

Table S1

A complete list of differentially regulated proteins in the livers of pregnant rats compared to non-pregnant animals.

| <b>Protein</b> | <b>Adjusted p-value</b> | <b>Fold change</b> |
|----------------|-------------------------|--------------------|
| Gpt            | 4,46967E-10             | -1,85948486        |
| Cyp2e1         | 1,32176E-08             | -1,0114077         |
| Nucb2          | 3,65243E-08             | 1,132442328        |
| Itih4          | 4,63822E-08             | 1,249052557        |
| RGD1564515     | 9,59995E-08             | 2,339801658        |
| Txndc5         | 1,74787E-07             | 1,121084912        |
| Ghr            | 2,94642E-07             | 1,343226079        |
| Pon1           | 4,17597E-07             | -1,38903531        |
| Cyp2c23        | 5,30031E-07             | -1,10320973        |
| Tdo2           | 9,14619E-07             | 1,474159785        |
| Rbp1           | 9,36038E-07             | 1,266827059        |
| Erlec1         | 1,10911E-06             | 1,079916281        |
| Serpind1       | 1,18975E-06             | 1,008261131        |
| Ecm1           | 1,28618E-06             | -1,31912475        |
| Enpep          | 2,0253E-06              | -1,29411848        |
| Cars           | 2,06098E-06             | 1,254863877        |
| Bckdk          | 2,82213E-06             | 1,235274054        |
| Sec23b         | 3,23682E-06             | 1,084036568        |
| Tat            | 3,3351E-06              | 1,279116213        |
| Ostc           | 4,26001E-06             | 1,125806441        |
| Ifih1          | 6,03487E-06             | 1,125725115        |
| Aspg           | 6,09719E-06             | -1,17021056        |
| Hmox1          | 6,30661E-06             | 1,006455132        |
| A1m            | 6,80242E-06             | 1,087892235        |
| Sgk2           | 7,12439E-06             | 1,327655031        |
| Ppib           | 8,03619E-06             | 1,06109836         |
| Cyp1a2         | 9,5515E-06              | -1,30528927        |
| LOC100912604   | 1,01749E-05             | 1,016769168        |
| Inf2           | 1,18268E-05             | 1,469347455        |
| Fmo5           | 1,42266E-05             | -1,18739966        |
| Eps8l2         | 1,48168E-05             | -2,04410127        |
| Prlr           | 1,71578E-05             | 1,553524253        |
| Ggcx           | 2,04904E-05             | 1,120959113        |
| Fads1          | 3,80956E-05             | 1,214052443        |
| Abhd5          | 3,97749E-05             | 1,71297585         |
| C6             | 4,98737E-05             | 1,482249706        |
| Ube2o          | 5,58361E-05             | 1,622300209        |
| Cyp2t1         | 5,74916E-05             | -1,13056325        |
| Igh-1a         | 6,7617E-05              | -1,51571952        |
| Abcg2          | 7,41811E-05             | 1,46453023         |

## Supplemental Information

|                                                             |             |             |
|-------------------------------------------------------------|-------------|-------------|
| Ftl1;RGD1566189;LOC100359668;LOC100362384;Ftl1l1;RGD1560687 | 0,000148493 | -1,0335802  |
| Bche                                                        | 0,000221714 | 1,310290253 |
| Golgb1                                                      | 0,000250418 | 1,103053677 |
| Agpat3                                                      | 0,000274668 | 1,661563613 |
| Fmo5                                                        | 0,000295493 | -1,40200063 |
| Adh6                                                        | 0,000380683 | -1,05364866 |
| Dsg2                                                        | 0,000468263 | -1,19116236 |
| Fads2                                                       | 0,000481895 | 1,108761339 |
| Ugt2a3                                                      | 0,00054402  | -2,00660312 |
| Akr7a3                                                      | 0,00066194  | -1,33059231 |
| S100a8                                                      | 0,000878277 | 1,268765973 |
| LOC100363239                                                | 0,000944143 | 1,385511651 |
| MGC108823;LOC100910979                                      | 0,000988818 | 1,351181267 |
| S100a9                                                      | 0,001221064 | 1,423756794 |
| Orm1                                                        | 0,001487371 | -1,1070007  |
| Hsd11b1                                                     | 0,001533249 | 1,441809185 |
| C1galt1                                                     | 0,001754962 | 1,067373375 |
| Cyp8b1                                                      | 0,001768257 | -1,24699418 |
| Mpa2l;LOC498435                                             | 0,002032028 | 1,335368925 |
| Pcdh1                                                       | 0,002139198 | -1,2811971  |
| Ldhb                                                        | 0,002222678 | 1,066203188 |
| Prlr                                                        | 0,002437701 | 1,742206037 |
| Hgfac                                                       | 0,00453066  | 1,026119511 |
| Acsm2                                                       | 0,005065323 | -1,72677103 |
| Fen1                                                        | 0,007361157 | 1,062455975 |
| Akr1c12                                                     | 0,007613422 | -1,57195659 |
| Fabp7                                                       | 0,008811216 | 1,094570845 |
| Stmn1                                                       | 0,008944547 | 1,65704866  |
| Plin2                                                       | 0,010097998 | 1,397405962 |
| Fndc3b                                                      | 0,01256438  | 1,056082676 |
| Abcb1a;Abcb1b                                               | 0,013695036 | -1,08843465 |
| Csad                                                        | 0,015532174 | -1,12339177 |
| Nlrc3                                                       | 0,015889107 | -1,19178763 |
| Anp32e                                                      | 0,017480082 | 1,723592694 |
| Minpp1;RGD1564801                                           | 0,026309831 | 1,103557489 |
| Fnbp1l                                                      | 0,026664322 | 1,47323413  |
| Ifit3                                                       | 0,028436515 | 1,055663884 |
| Tp53i11                                                     | 0,03013711  | 2,047423124 |
| Crip1                                                       | 0,030346386 | 1,780689281 |
| Abcg3l1;Abcg3l3                                             | 0,034612388 | 1,045874544 |
| Tmem205                                                     | 0,041742616 | 1,125653348 |
| Crbn                                                        | 0,044181673 | 1,035625052 |
| LOC501233                                                   | 0,047281001 | -1,17871307 |

## Supplementary Figures

## Supplementary Fig. S1 Capacity-Protein Correlations

Significantly regulated functional proteins were determined by a linear regression model assessing the association between maximal metabolic capacities and the abundance of proteins belonging to the respective pathway. Red dotted lines indicate 95% confidence intervals of the linear model given by the solid red line. Dots represent values of protein abundance and associated metabolic function for individual samples (blue: control liver,  $n = 6$ ; orange: liver of pregnant animals,  $n = 6$ ). The level of significance was  $p < 0.05$ . For the significantly associated functional proteins, the differences between groups were assessed by a two-sided t-test.

For fatty acid metabolism, we identified 22 proteins of which 18 were significantly different between the groups (fatty acid utilization (10/7), triacylglycerol (TAG) synthesis and storage (10/9), and lipoprotein synthesis (2/2)). For carbohydrate metabolism, we identified 23 proteins of which 19 were significantly different between the groups (fructose (7/5), glucose (13/3), and glycerol (3/2)). For urea synthesis, 15 proteins were identified of which nine were significantly reduced in livers of pregnant rats, and for ethanol detoxification, two proteins were identified, both significantly different between the two groups. All significantly associated proteins and the respective metabolic functions are depicted below. The upper panels show the linear regression model,  $p$ -values are given in the lower right corner. Lower panels show box plots of protein abundance levels for control livers and livers of pregnant animals. The center lines represent the median, the boxes represent the interquartile range, and the whiskers are defined by values within 1.5 times the interquartile range. Individual values for the different samples are represented as black dots. Red and black bars indicate significant differences with  $p$ -values  $< 0.01$  and  $< 0.05$ , respectively.

## (A) Ethanol detoxification

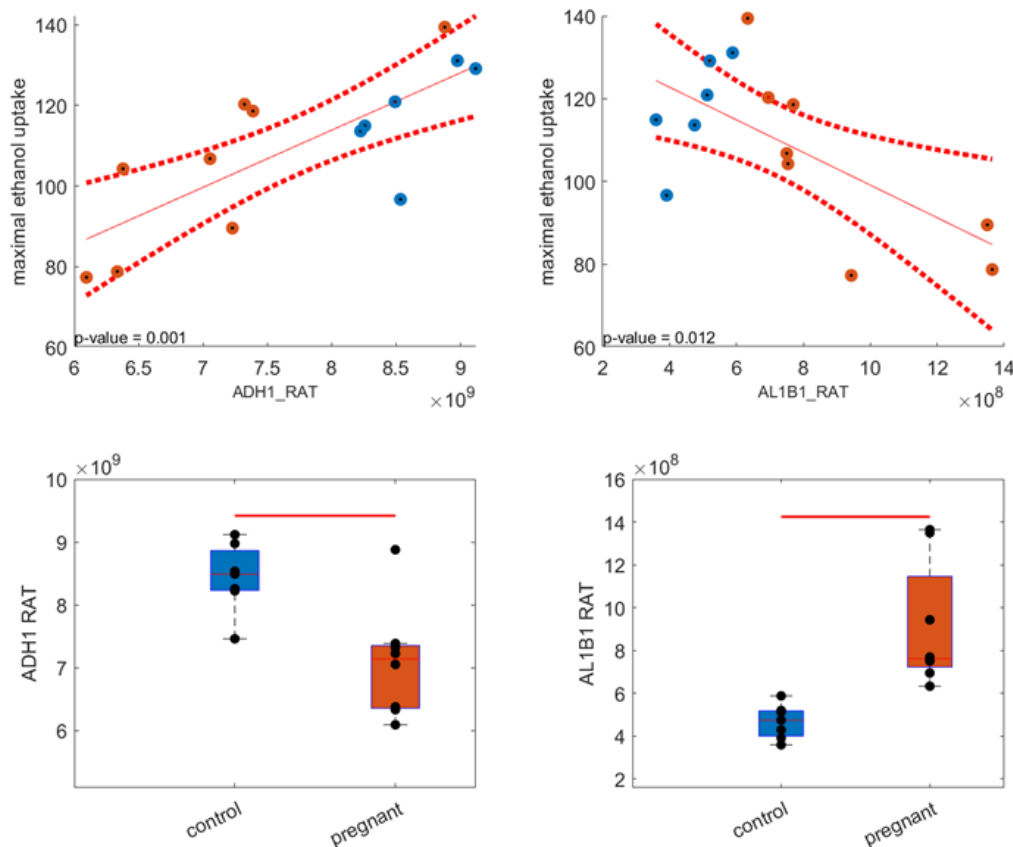

**(B) Fatty acid utilization**

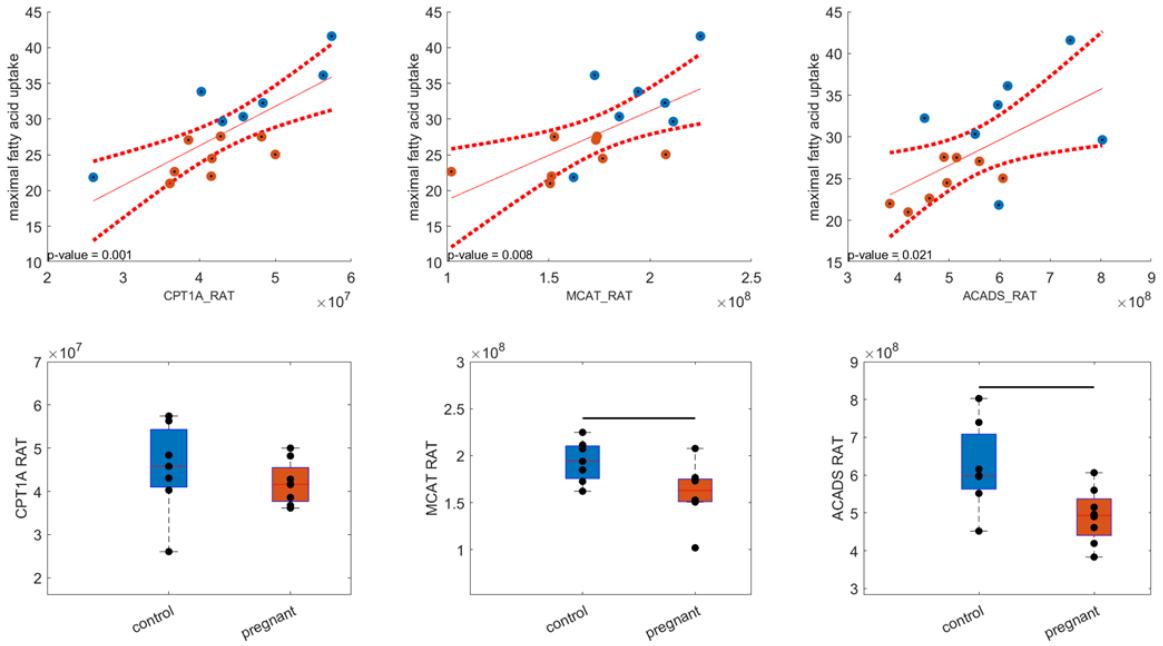

**(C) Fatty acid utilization**

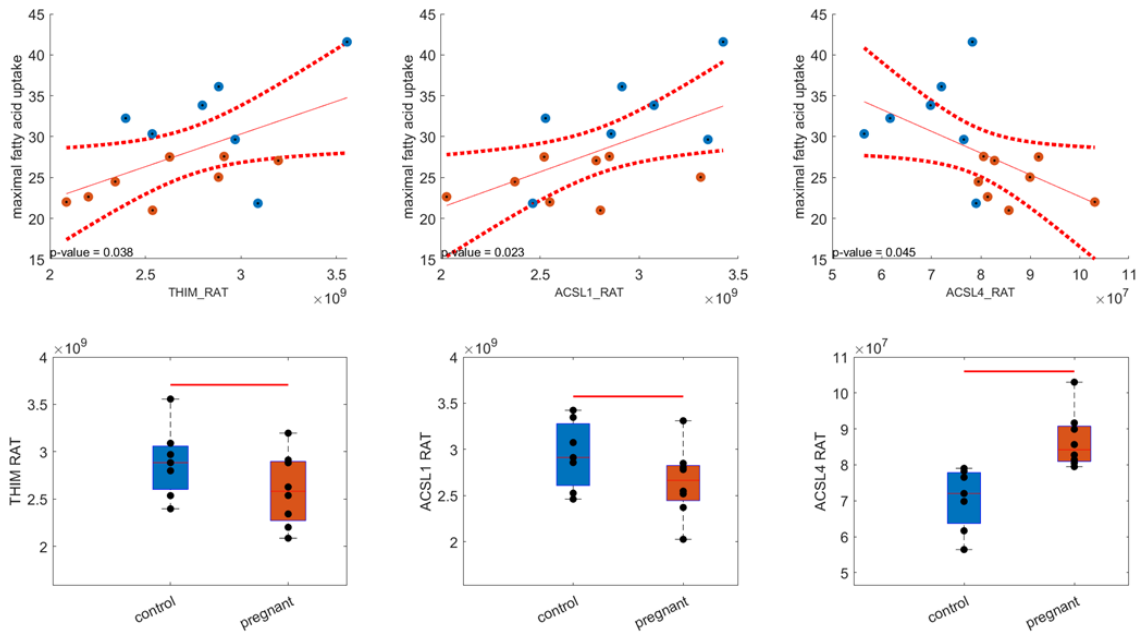

(D) Fatty acid utilization

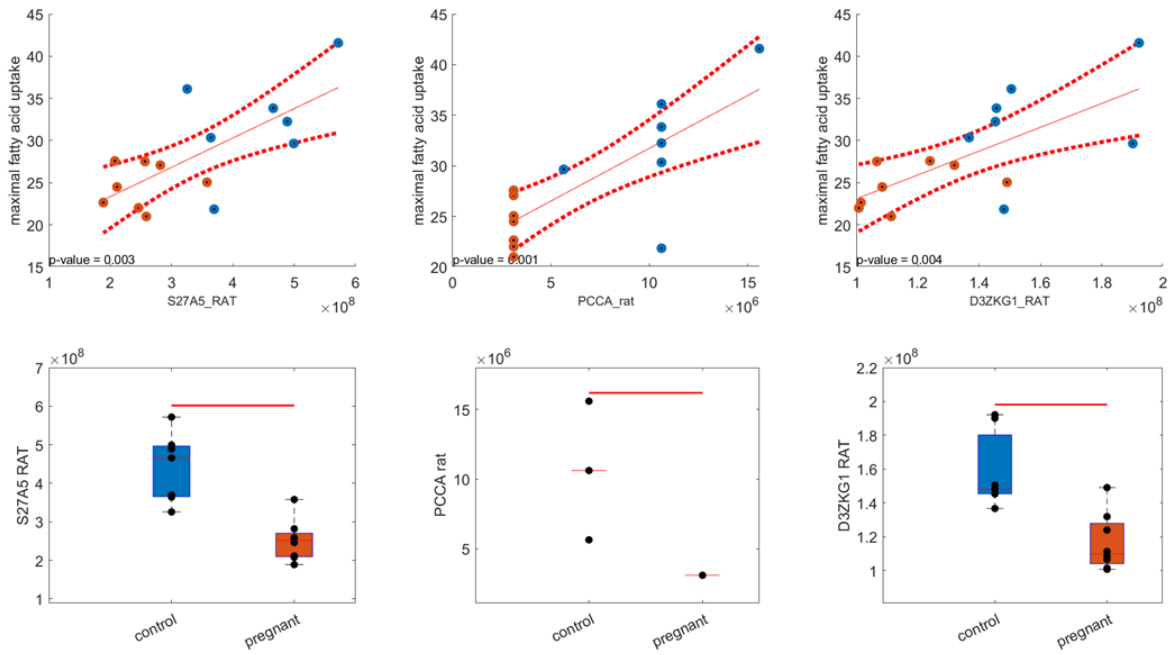

(E) Fatty acid utilization

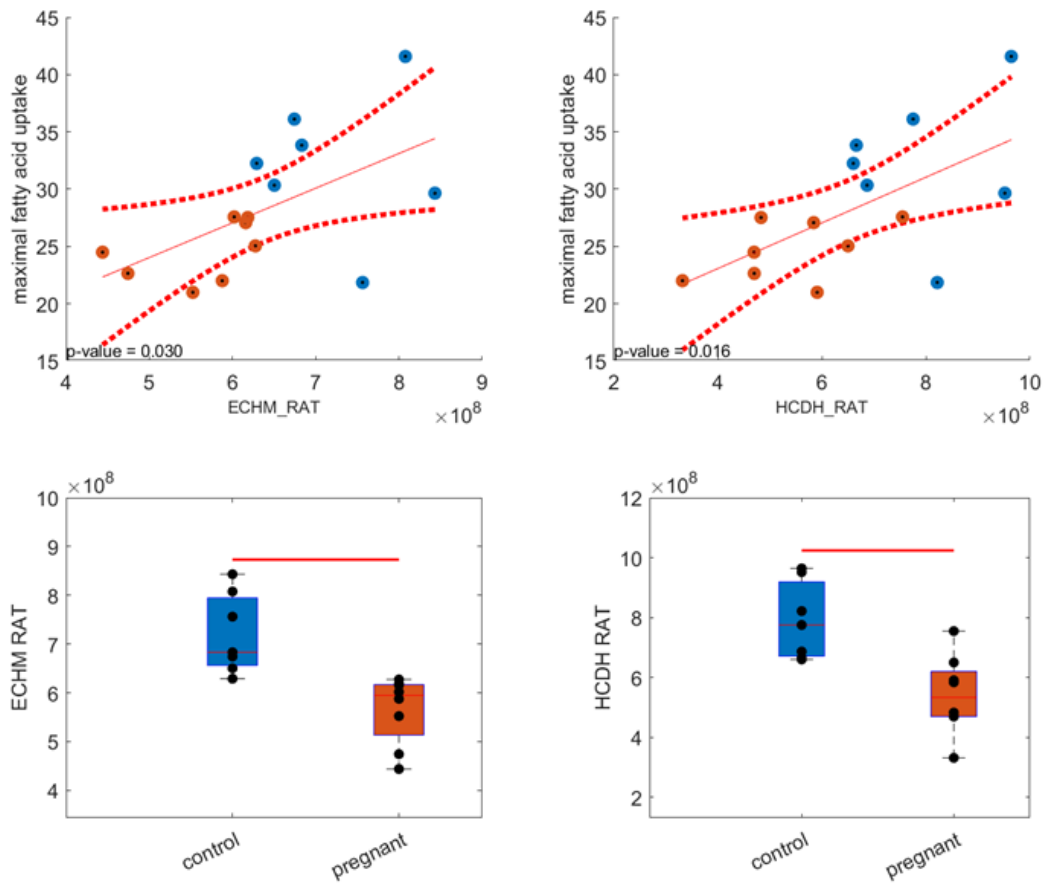

(F) Triacylglycerol (TAG) synthesis

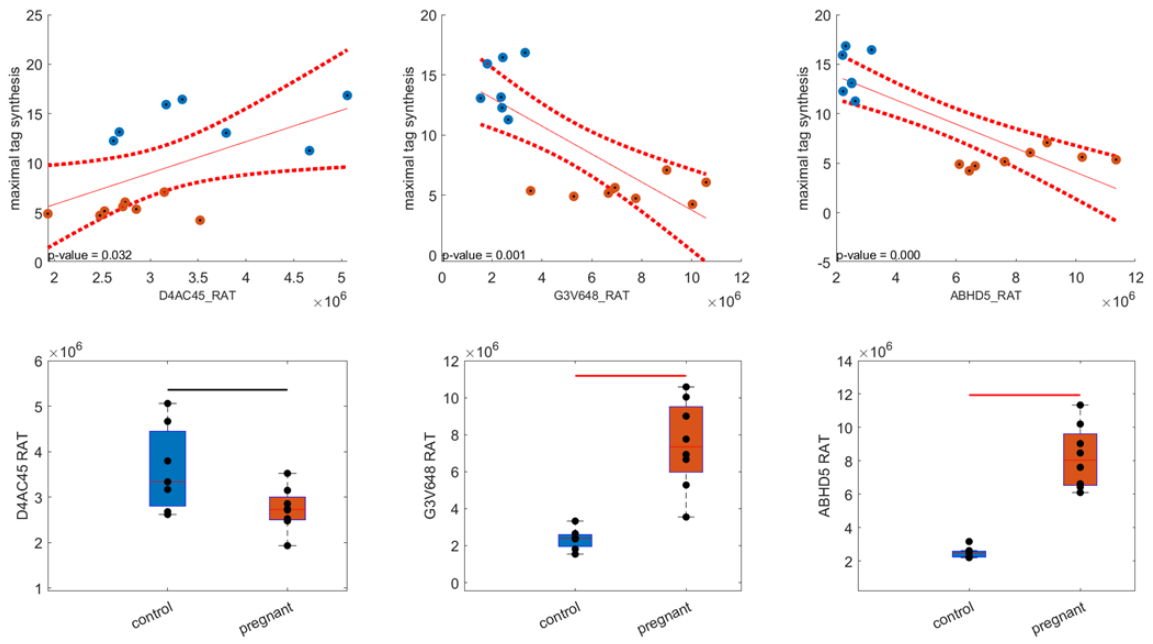

(G) TAG synthesis

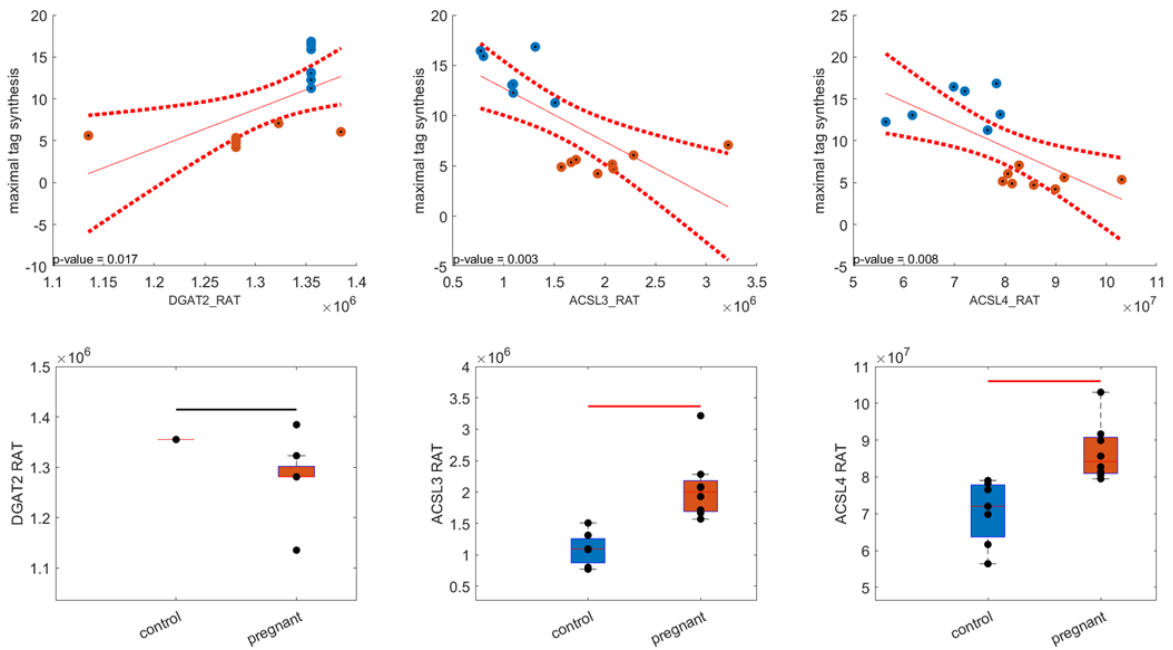



(H) TAG synthesis

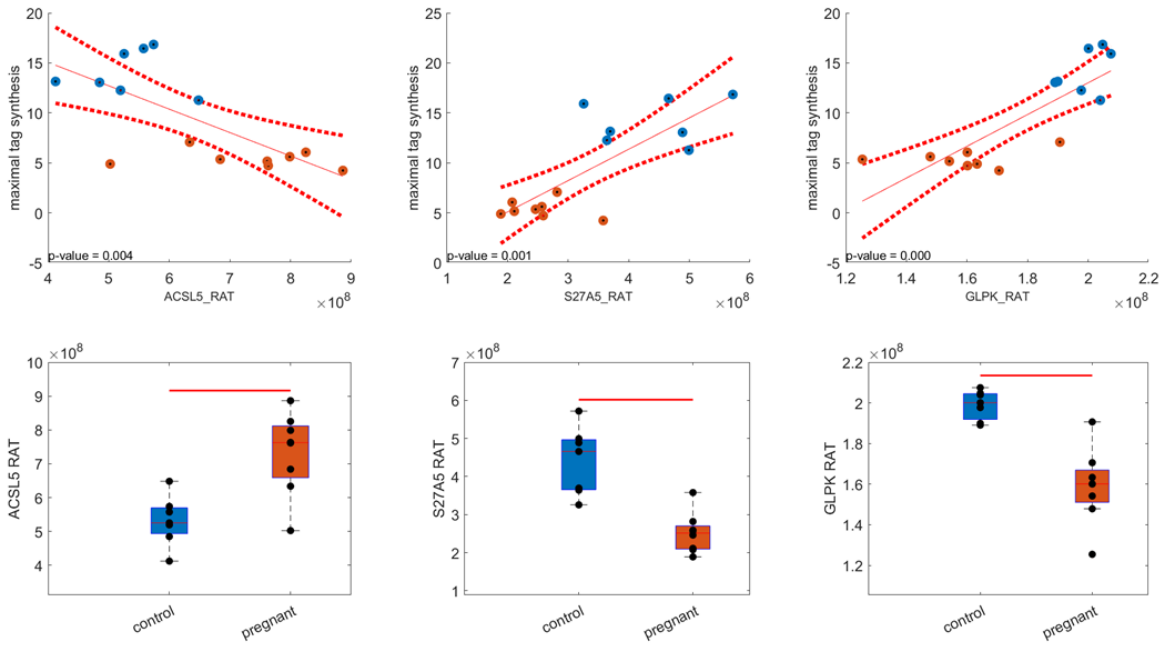

(I) TAG synthesis

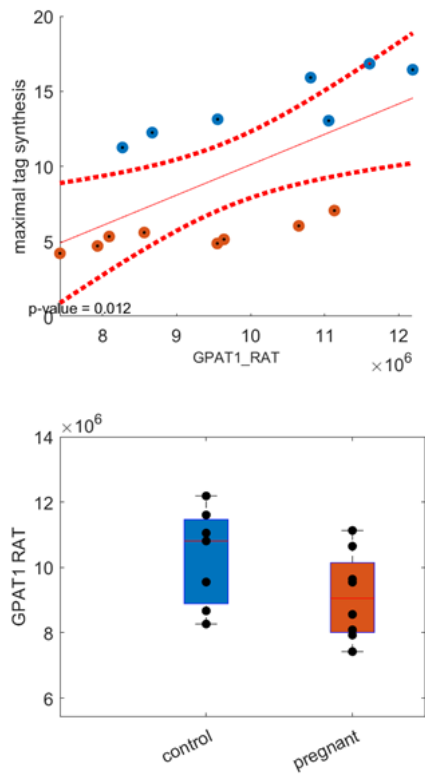

(J) Lipoprotein synthesis

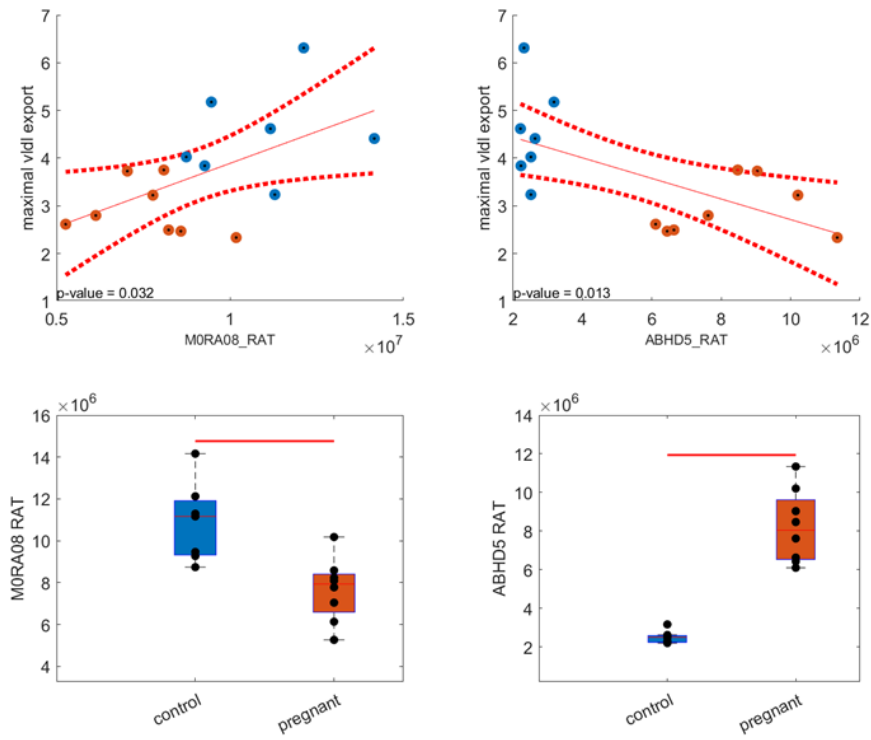

(K) Fructose metabolism

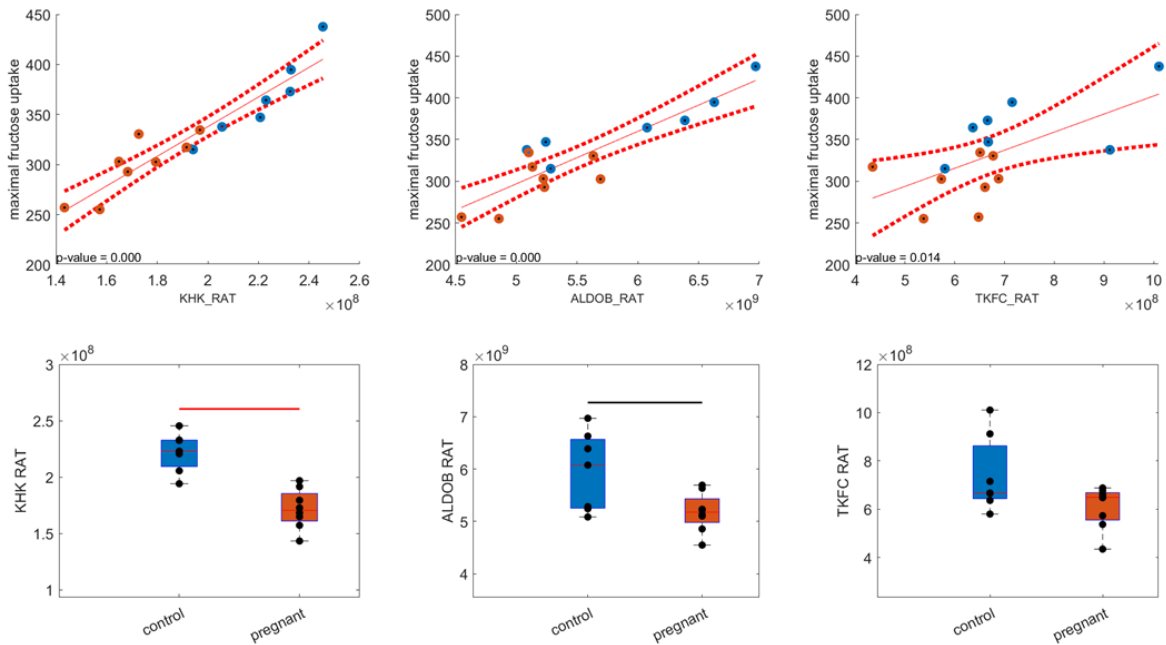

(L) Fructose metabolism

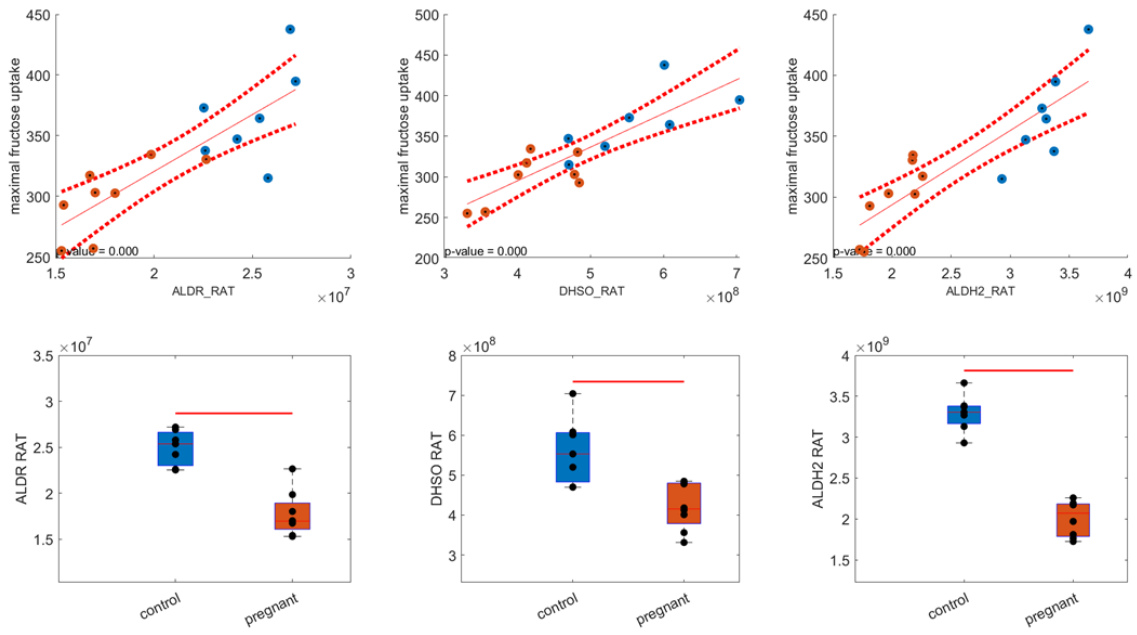

(M) Fructose metabolism

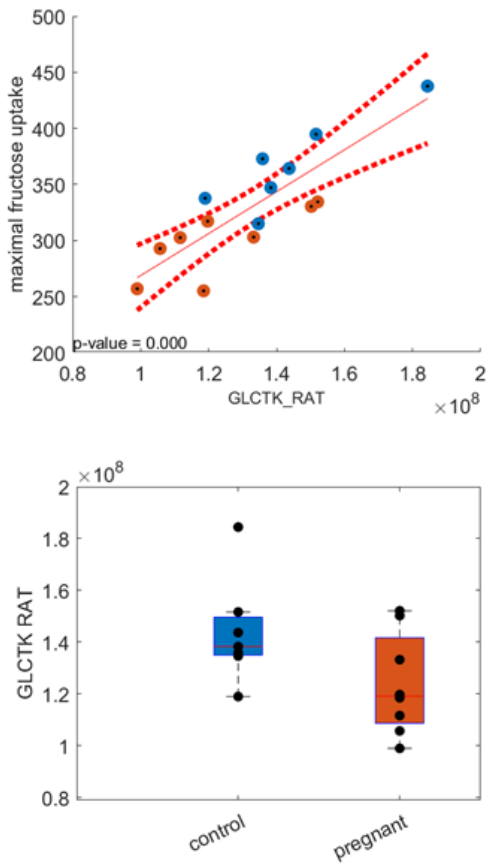

(N) Glycerol uptake

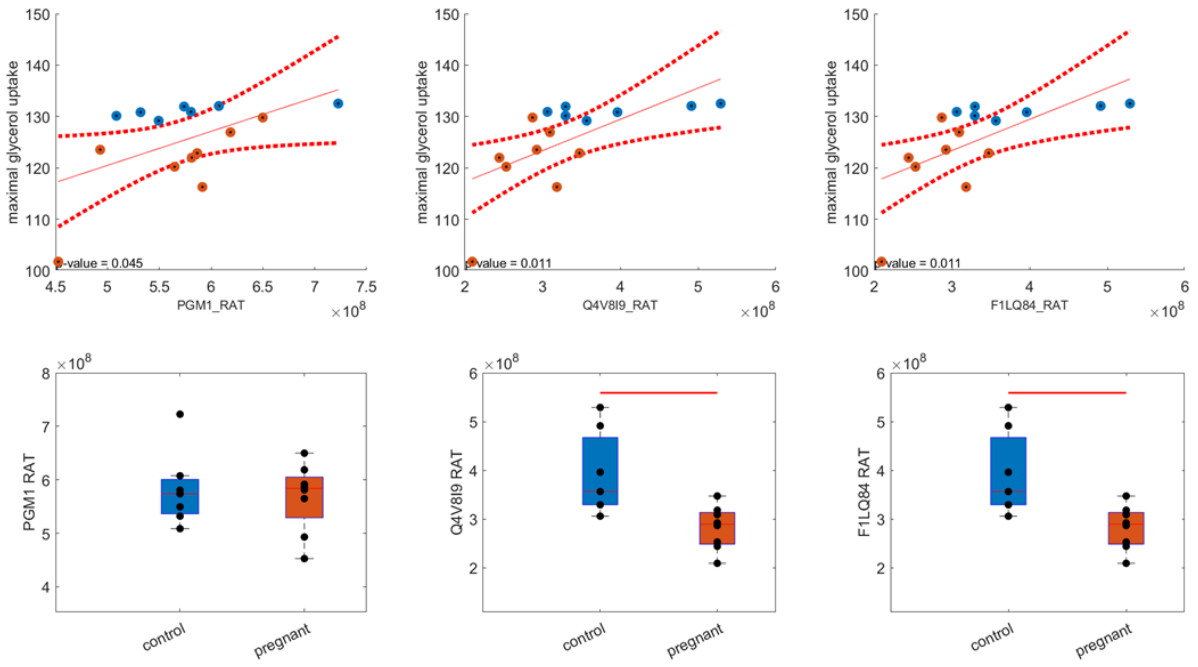

(O) Urea synthesis

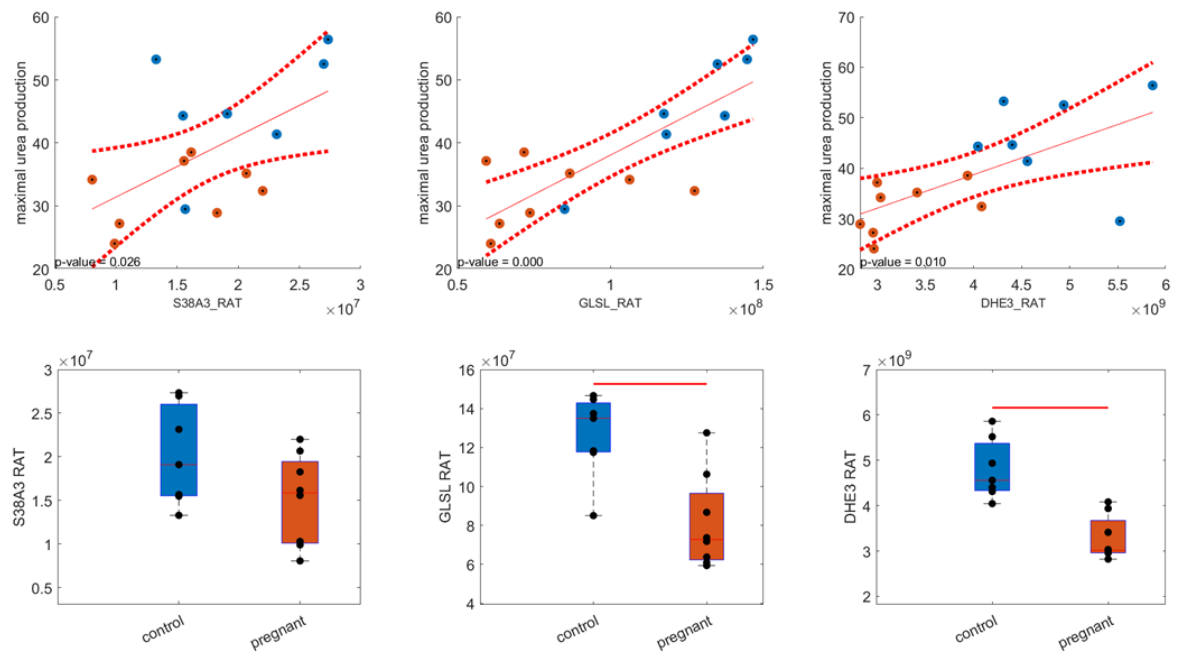

*(P) Urea synthesis*

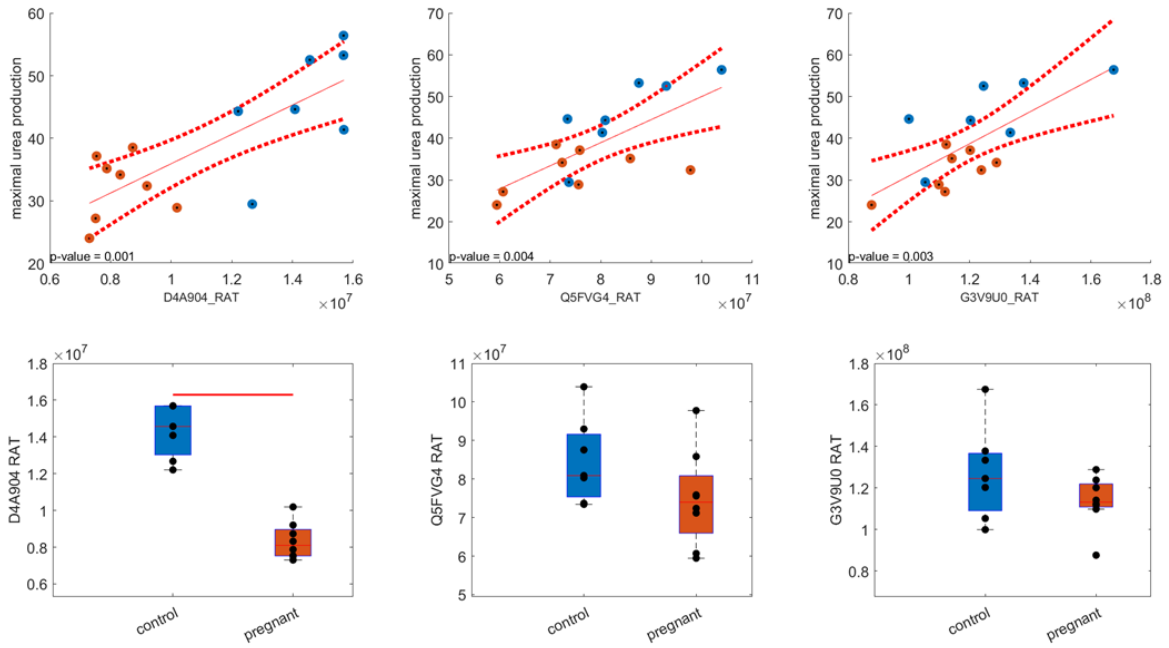

*(Q) Urea synthesis*

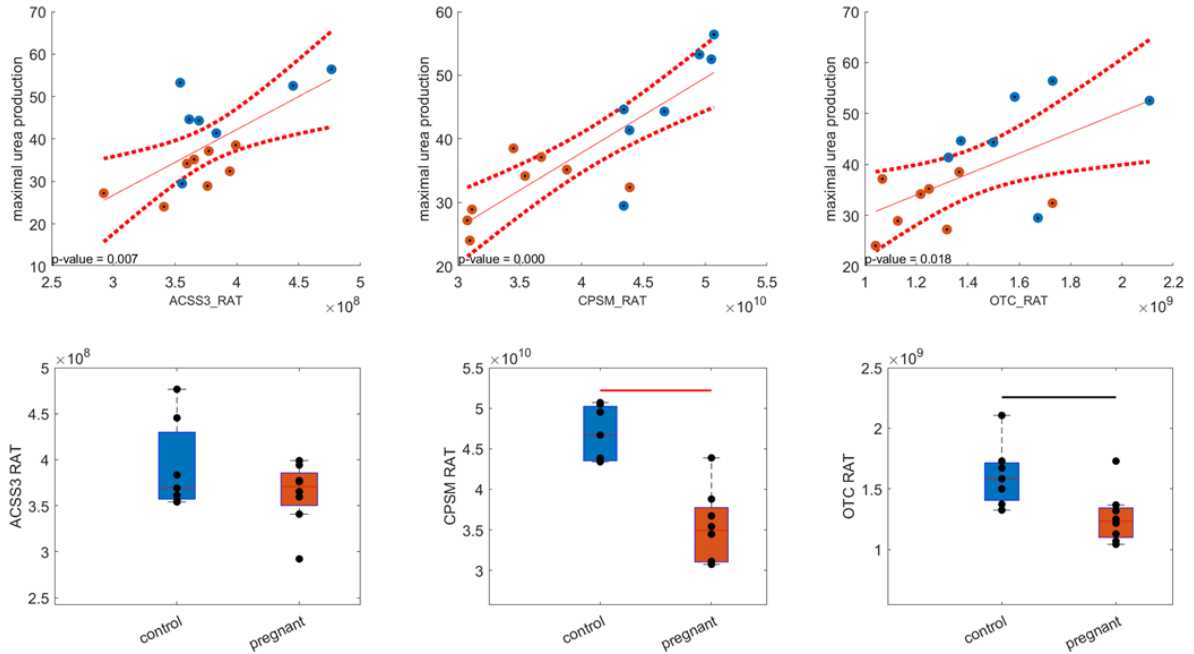

(R) Urea synthesis

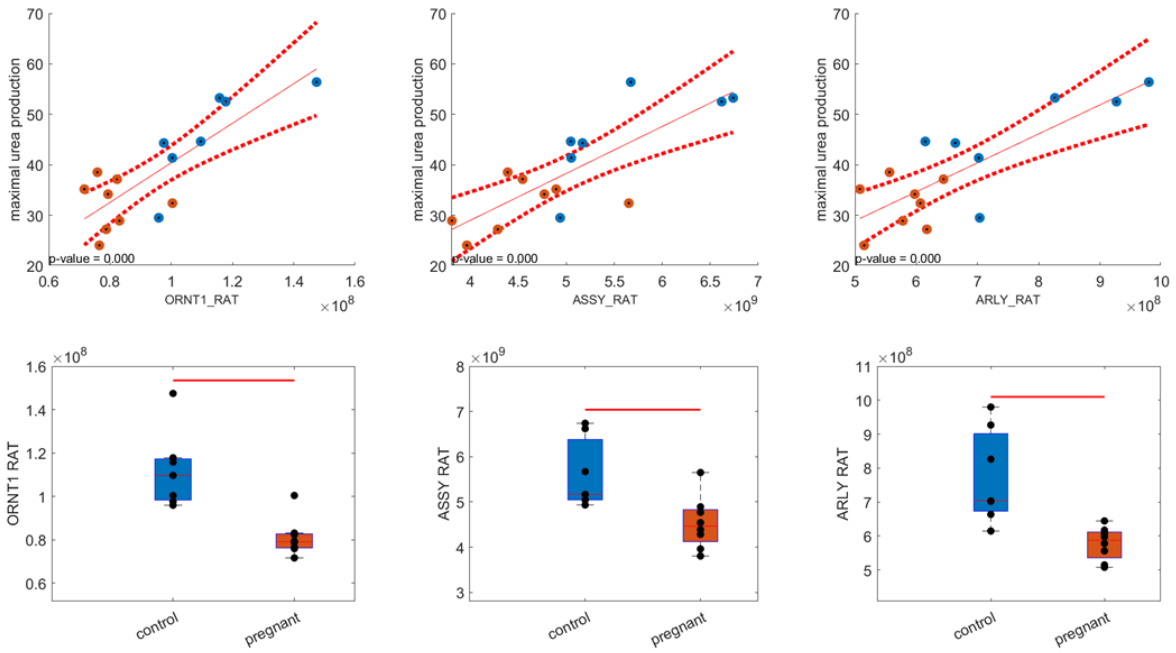

(S) Urea synthesis

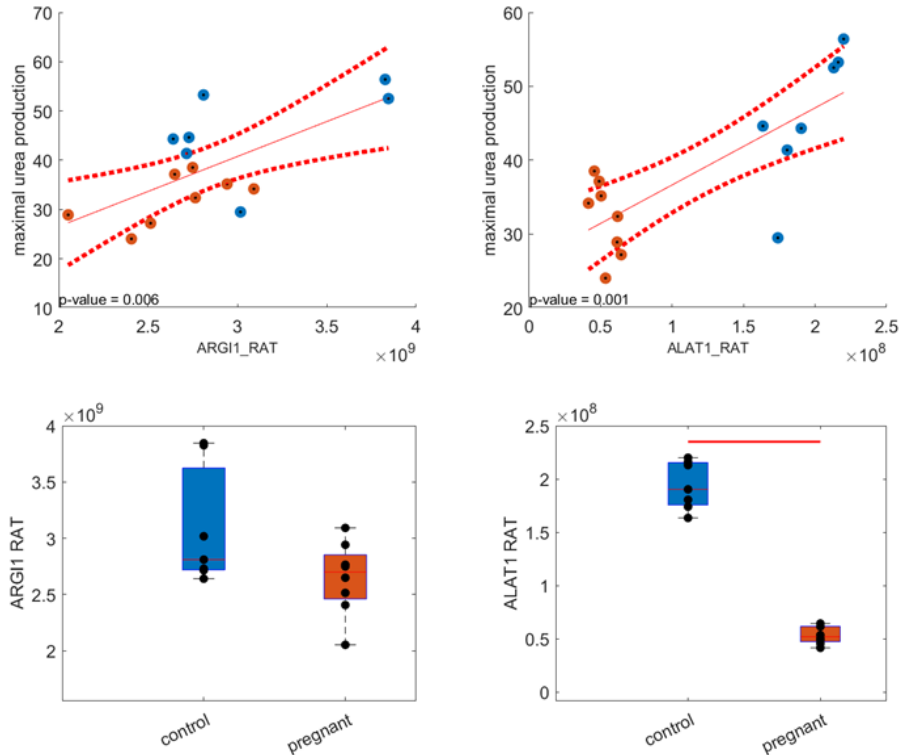

### Supplementary Fig. S2 Correlations between the biophysical properties and the metabolic functions under physiological conditions

The association between visco-elastic properties and the different metabolic functions was determined by a linear regression model. Linear regression fit and associated p-values for the association between visco-elastic properties ( $c$  in m/s, shear wave speed;  $a$  in m/s, penetration rate; and ADC in  $10^{-3} \text{ mm}^2/\text{s}$ , apparent diffusion coefficient) and the different metabolic functions are given below.

The differences in the metabolic functions between the control livers ( $n = 6$ ) and the livers of pregnant animals ( $n = 6$ ) are given by the box plots in the first panels. The center lines represent the median, the boxes represent the interquartile range, and the whiskers are defined by values within 1.5 times the interquartile range. Individual values for the different samples are represented as black dots. P-values are given above the brackets. Red and black brackets indicate significances with p-values  $<0.01$  and  $<0.05$ , respectively. Orange and yellow brackets indicate a tendency with p-values  $<0.1$  and  $<0.25$ , respectively. The 2<sup>nd</sup> to 4<sup>th</sup> panels show a linear regression model between the metabolic function and the visco-elastic properties. Red dotted lines indicate 95% confidence intervals of the linear model given by the solid red lines. Dots represent values of protein abundances and associated metabolic functions for individual samples (blue: control liver, orange: liver of pregnant rats). P- and R<sup>2</sup>-values for linear regression are given in the lower right corner.

#### (A) Urea production

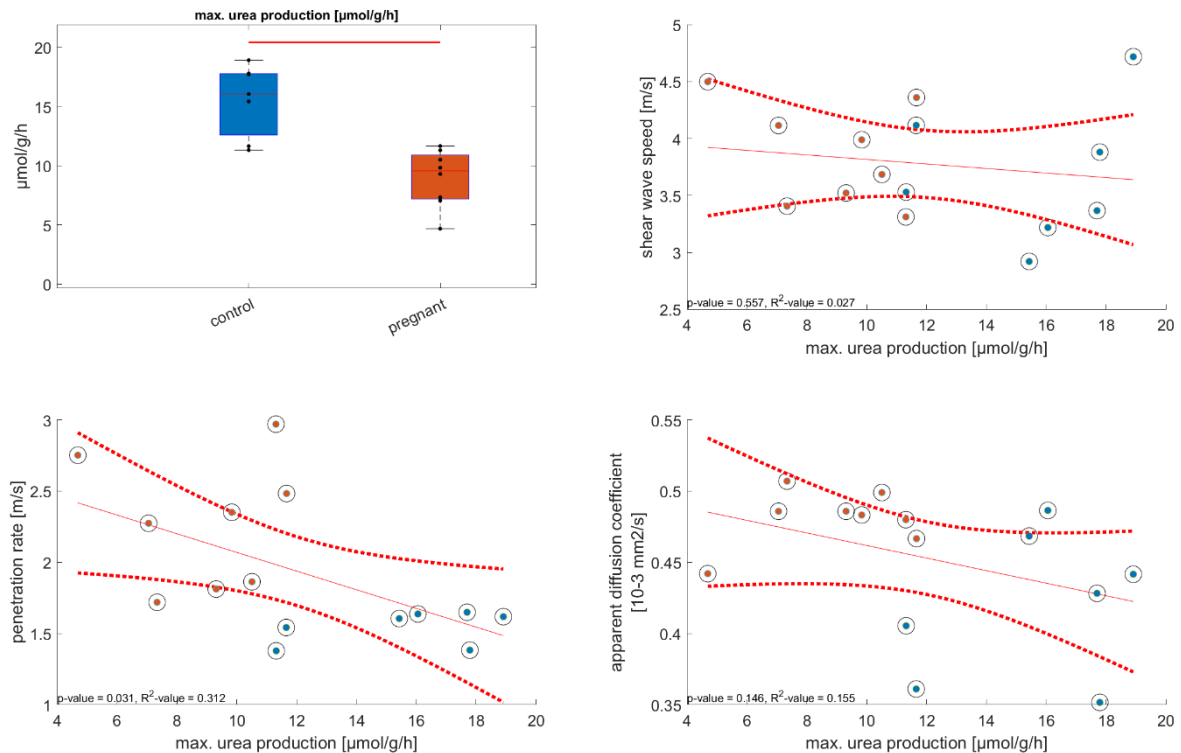

**(B) TAG synthesis**

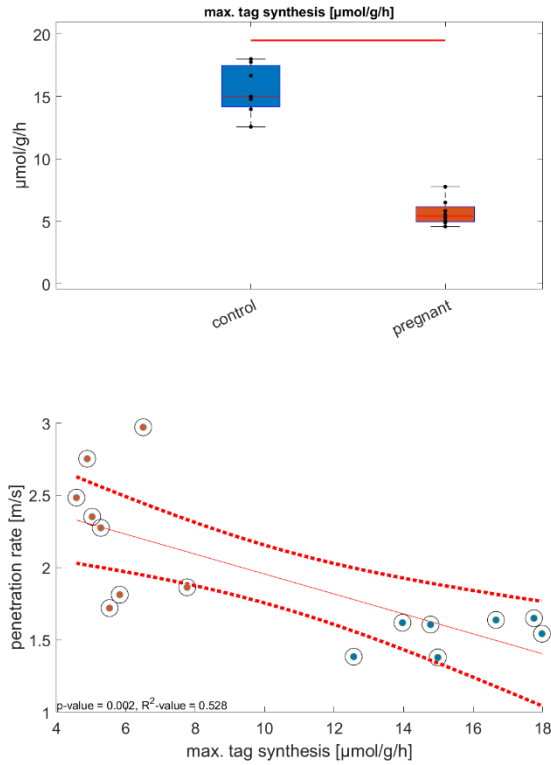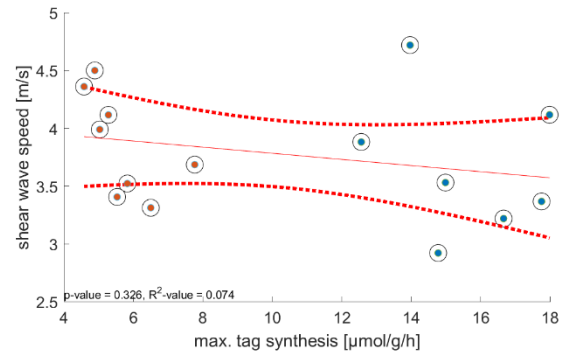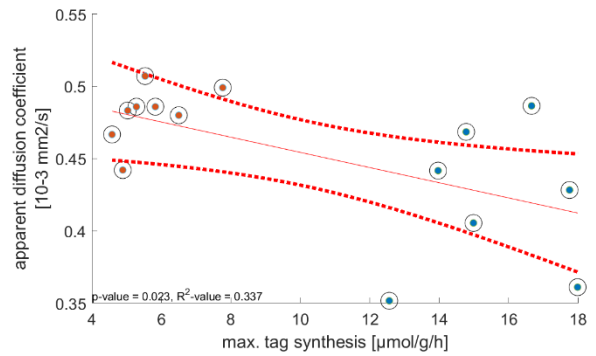

**(C) TAG storage**

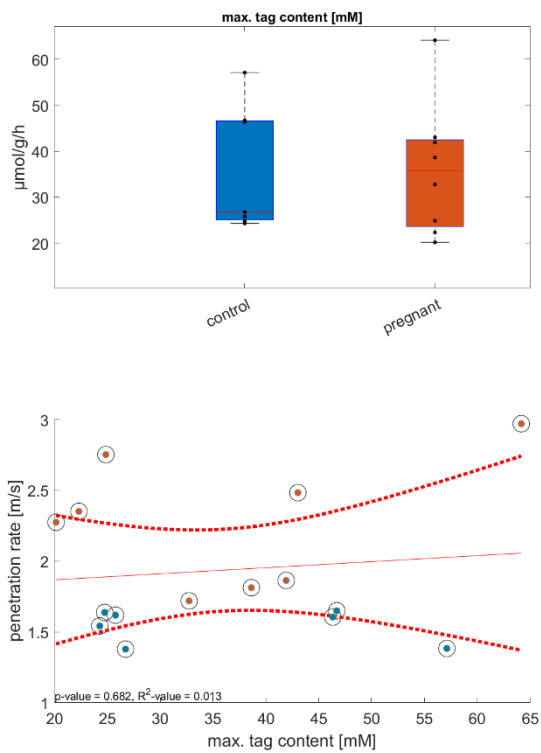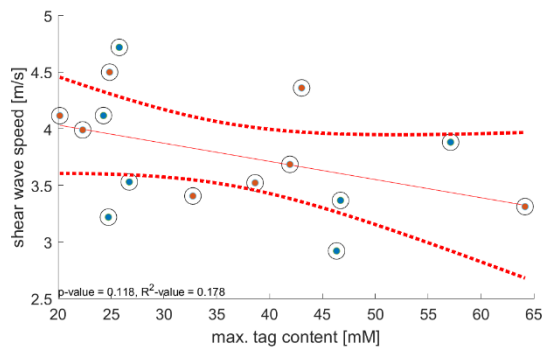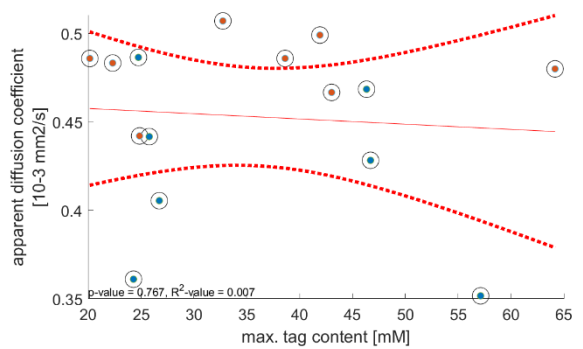



(D) Ammonia uptake

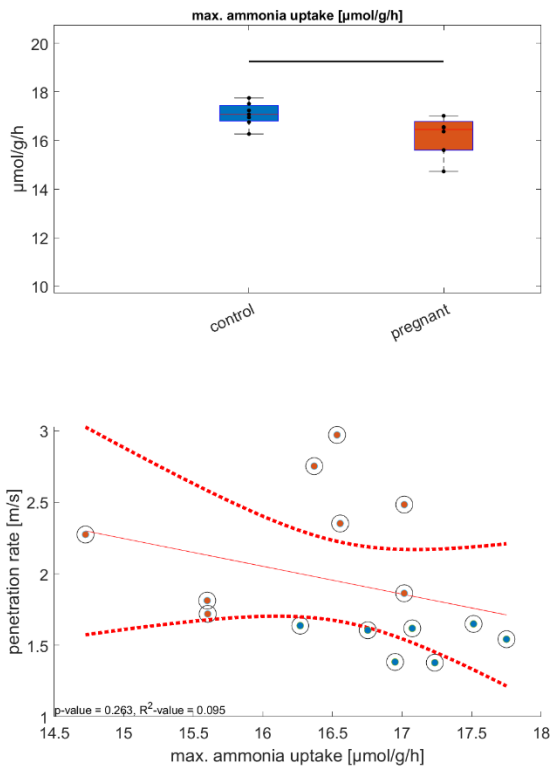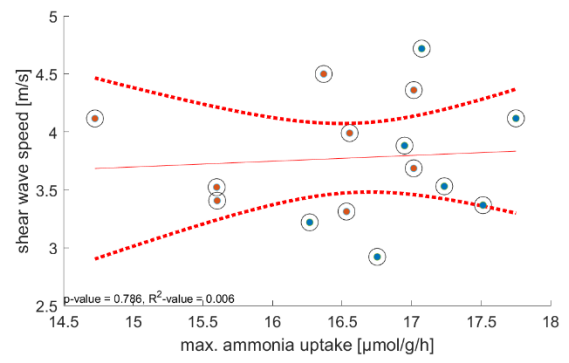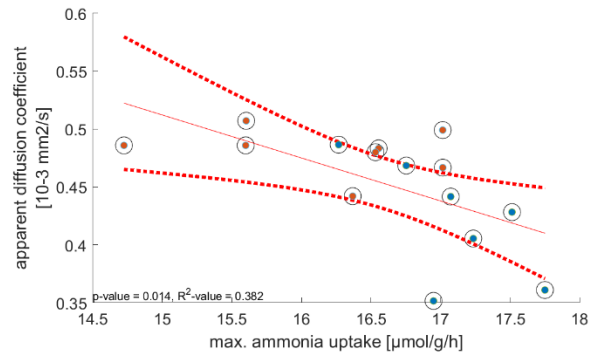

(E) Ketone body production

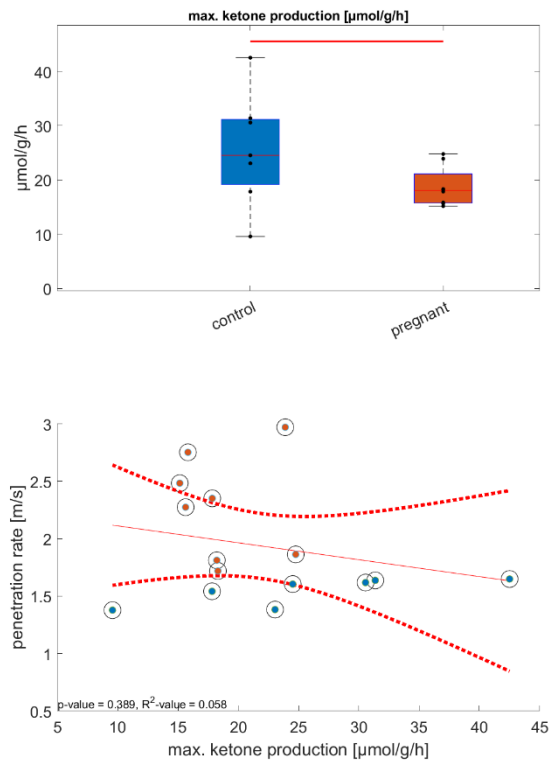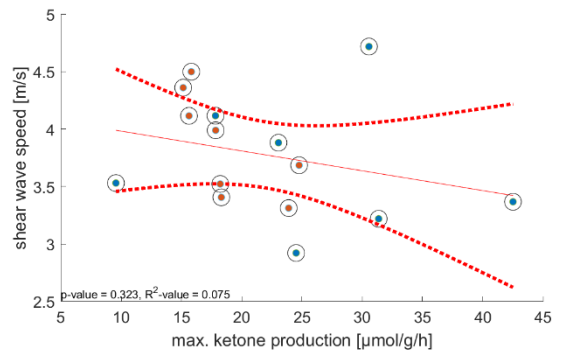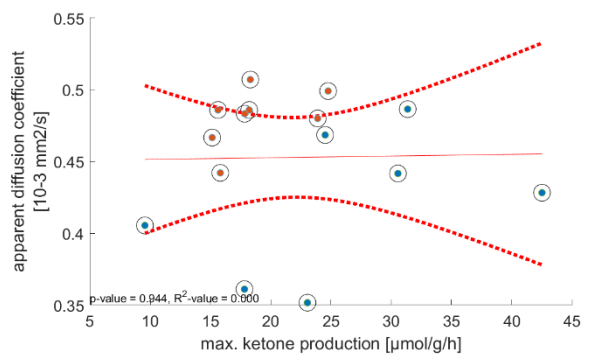

(F) Gluconeogenesis

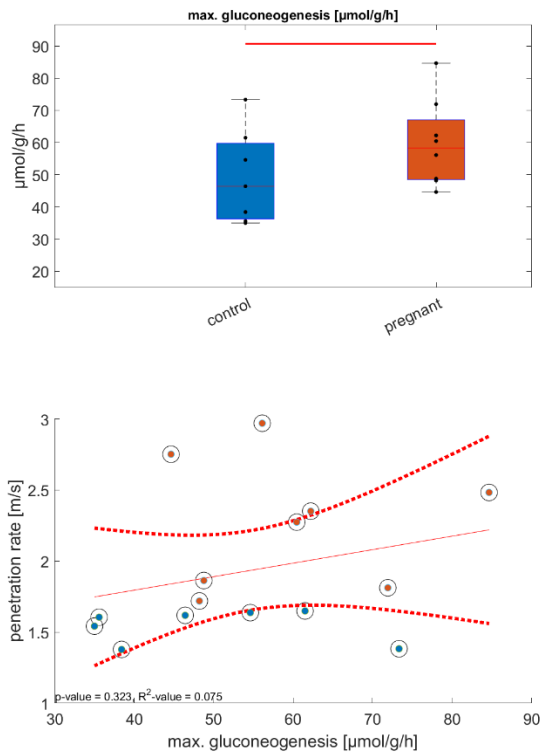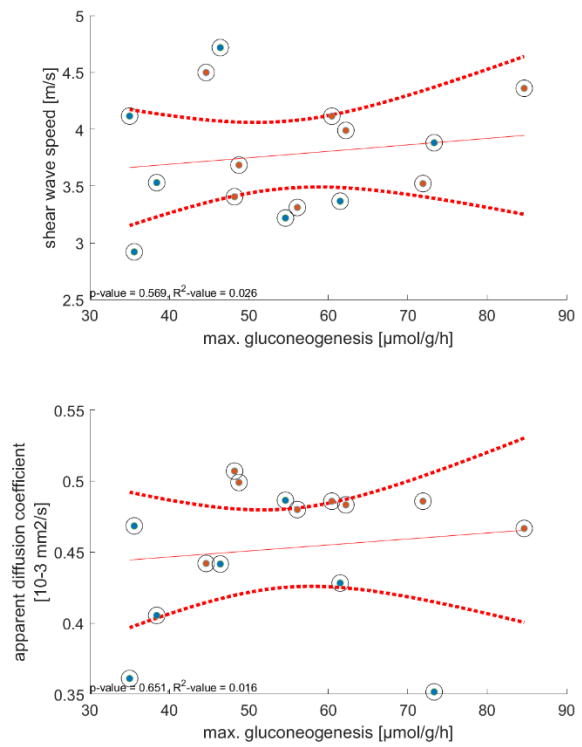

(G) Glucose uptake

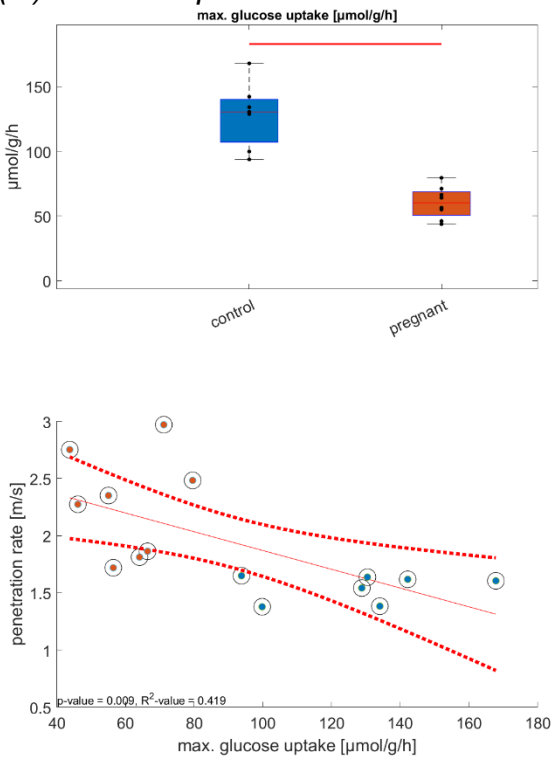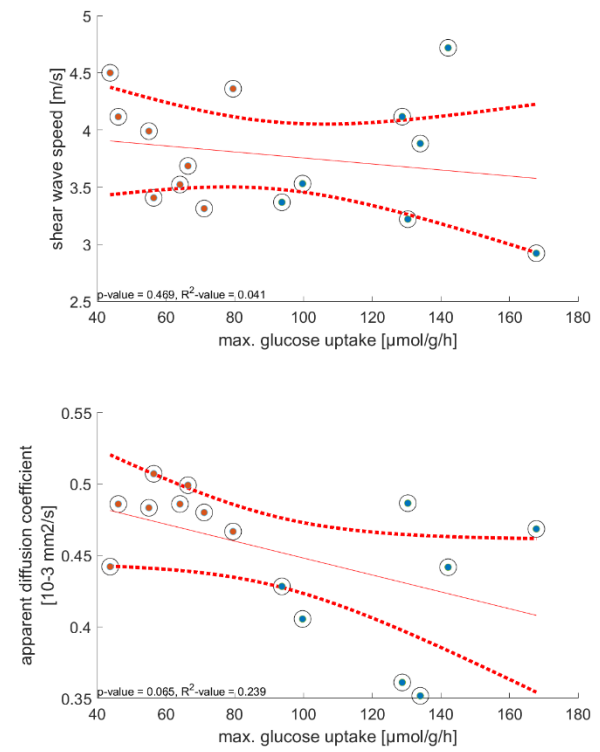

(H) Glutamate exchange

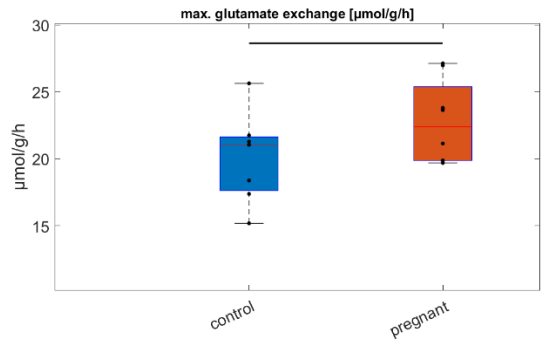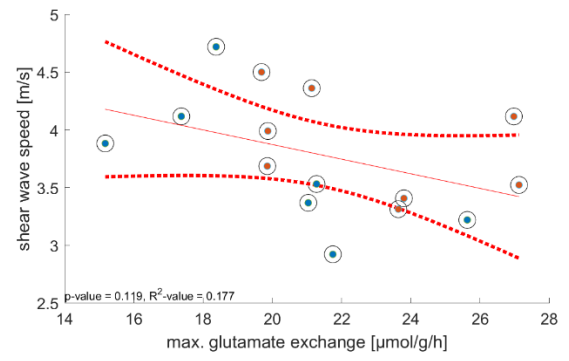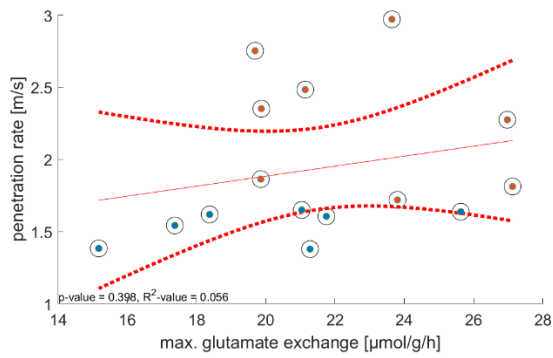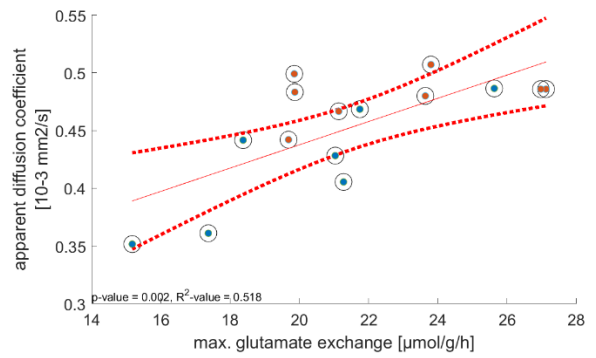

(I) Glutamine exchange

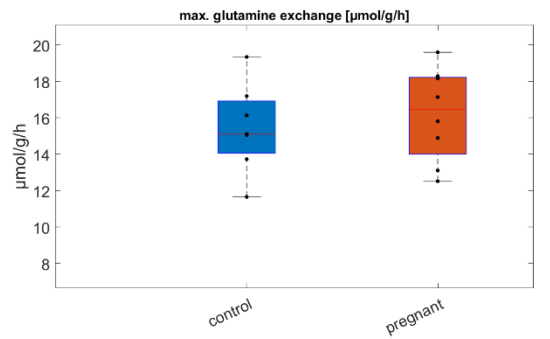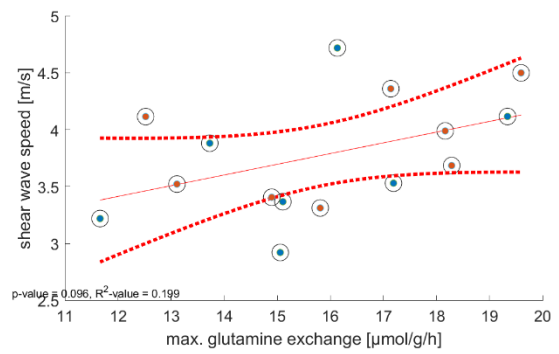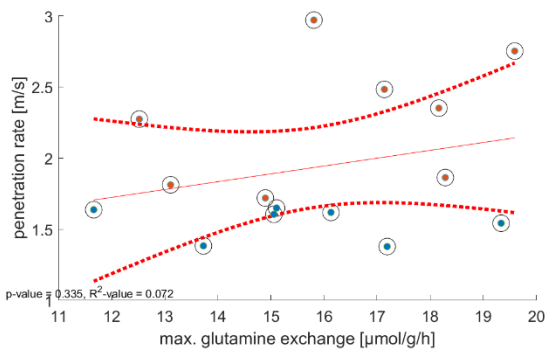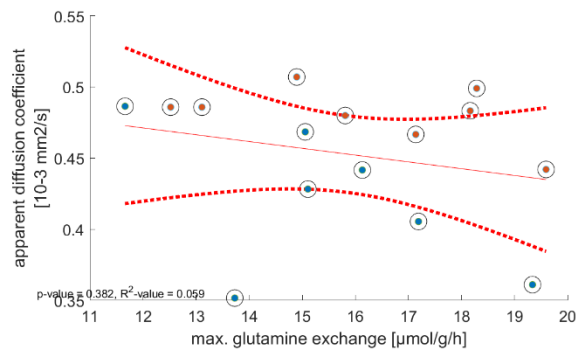

(J) Fatty acid uptake

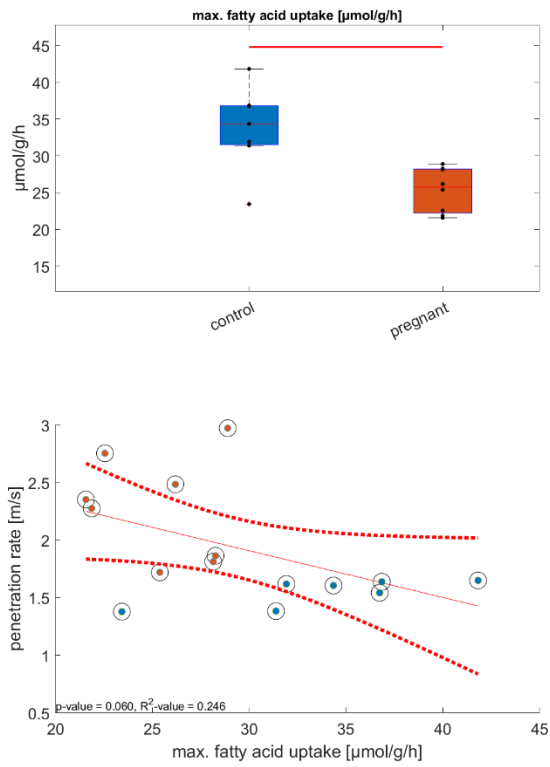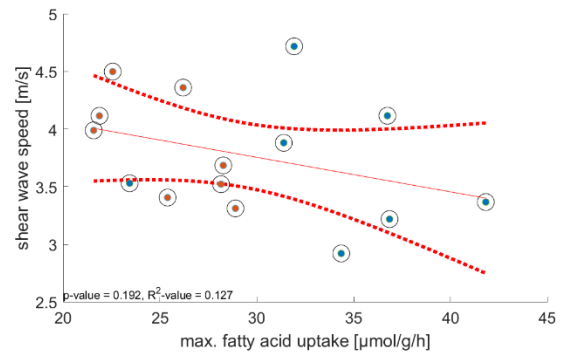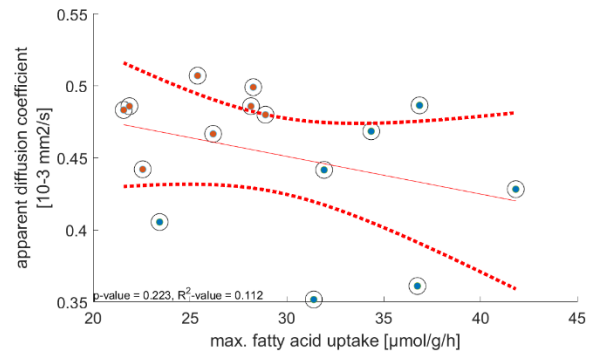

(K) Fatty acid synthesis

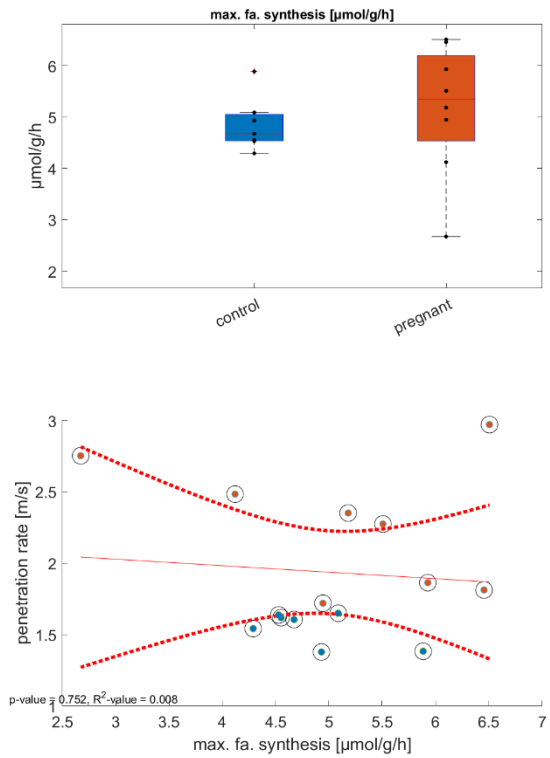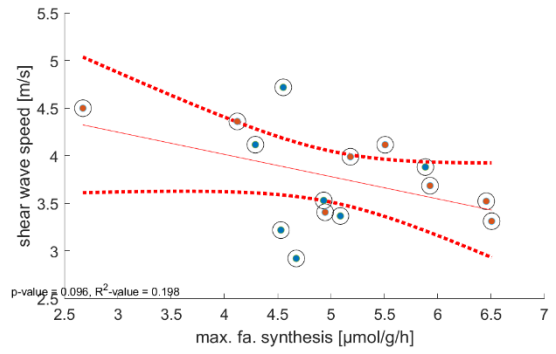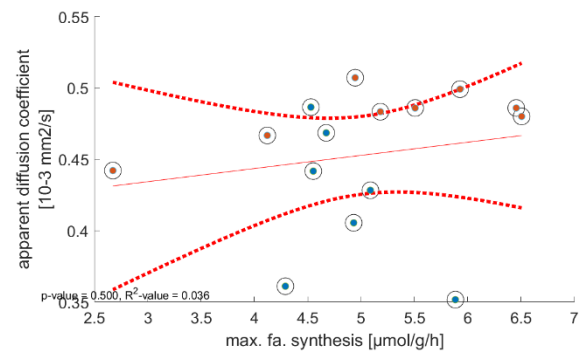

**(L) Cholesterol synthesis**

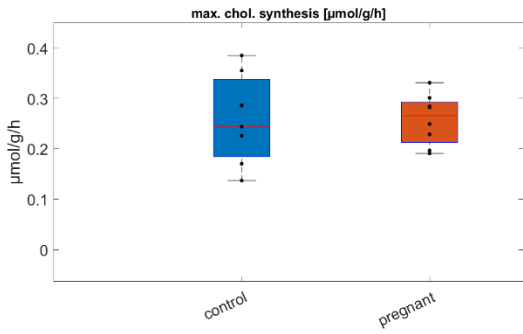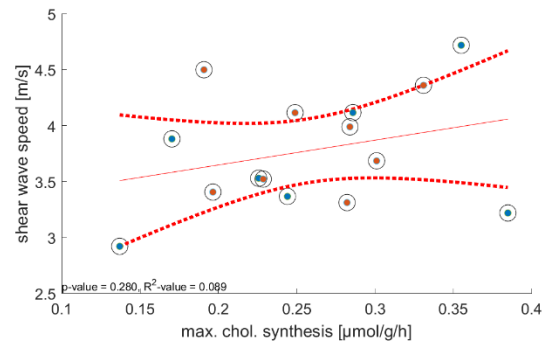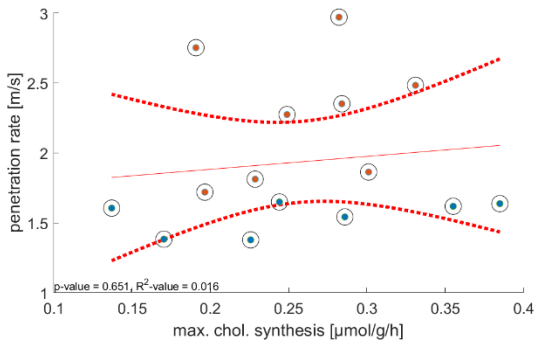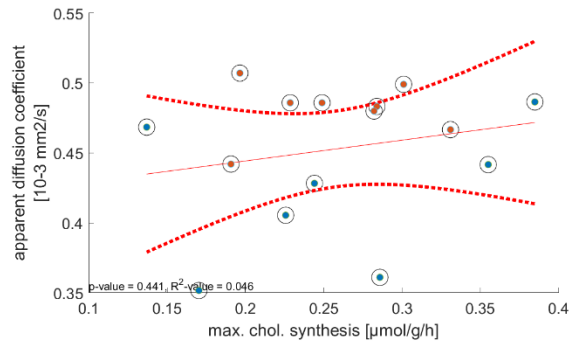

**(M) Beta-oxidation**

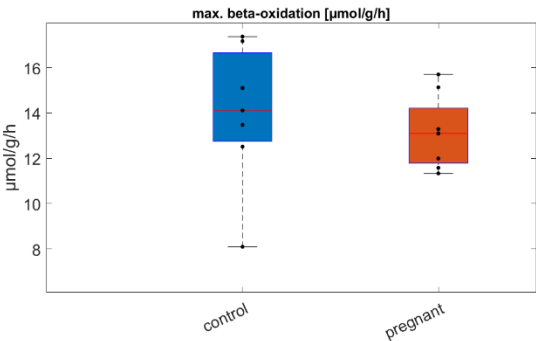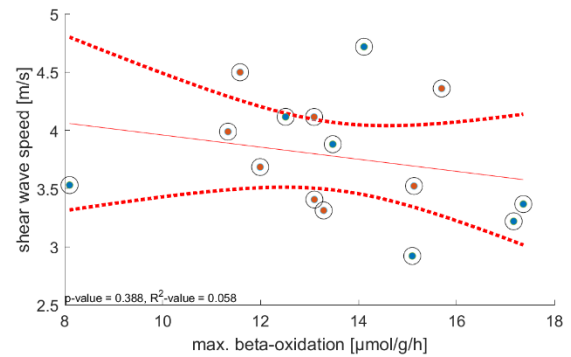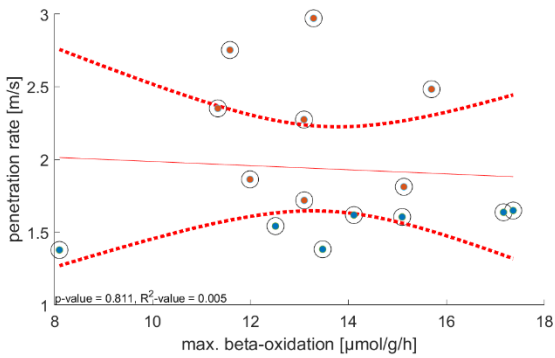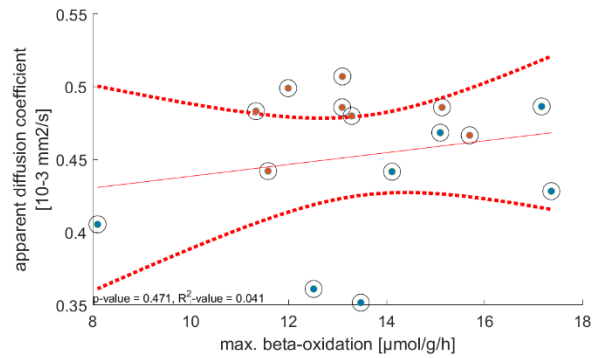

(N) Very-low-density lipoprotein (VLDL) production

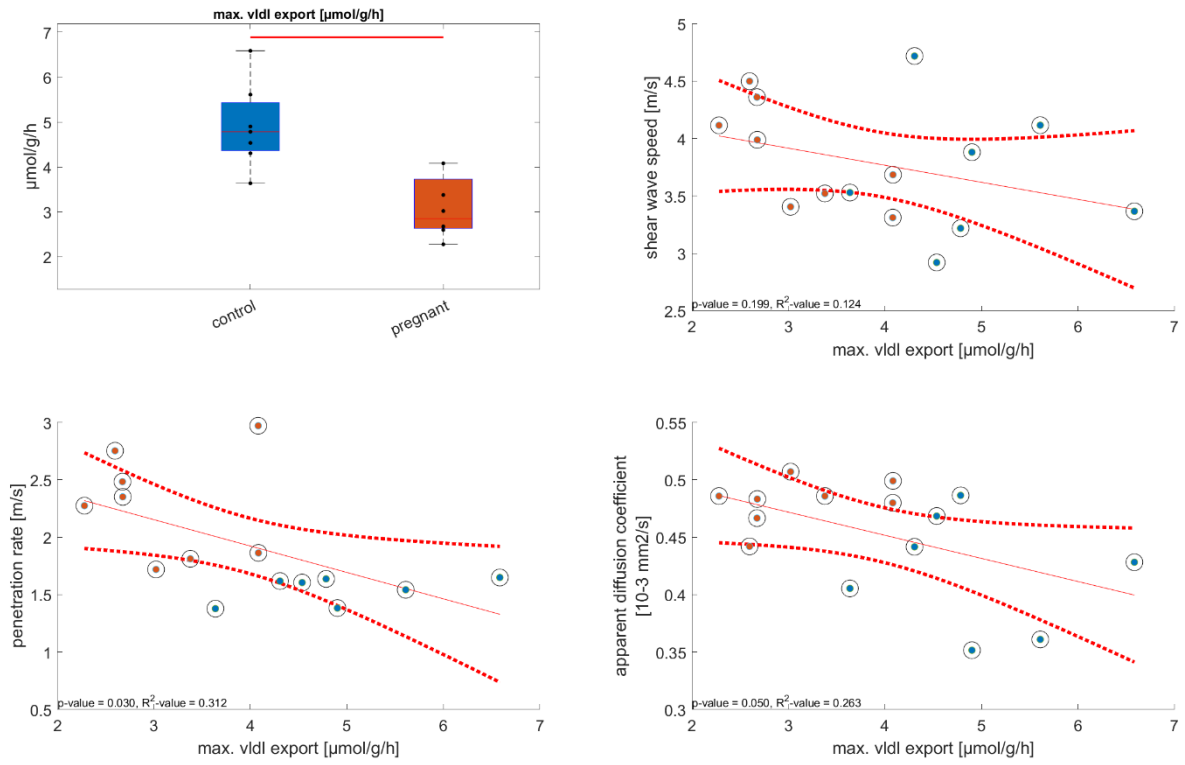

(O) Acetoacetate production

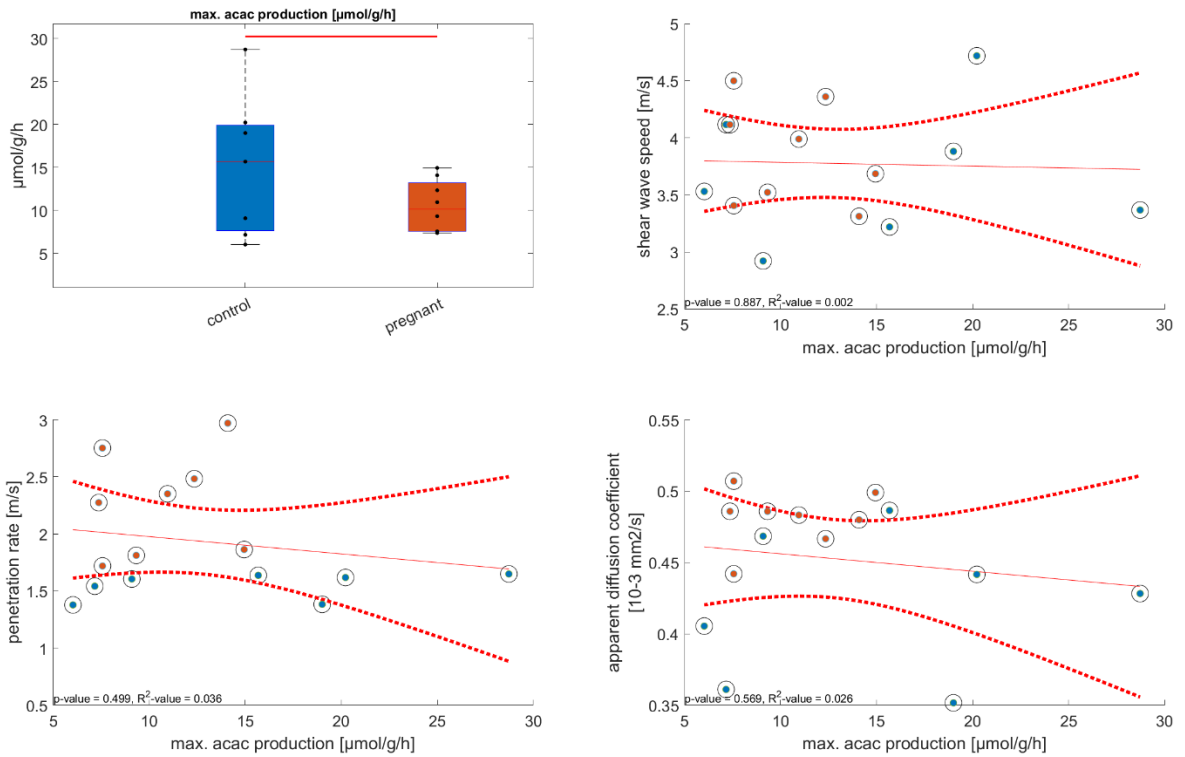

*(P) Beta-hydroxybutyrate production*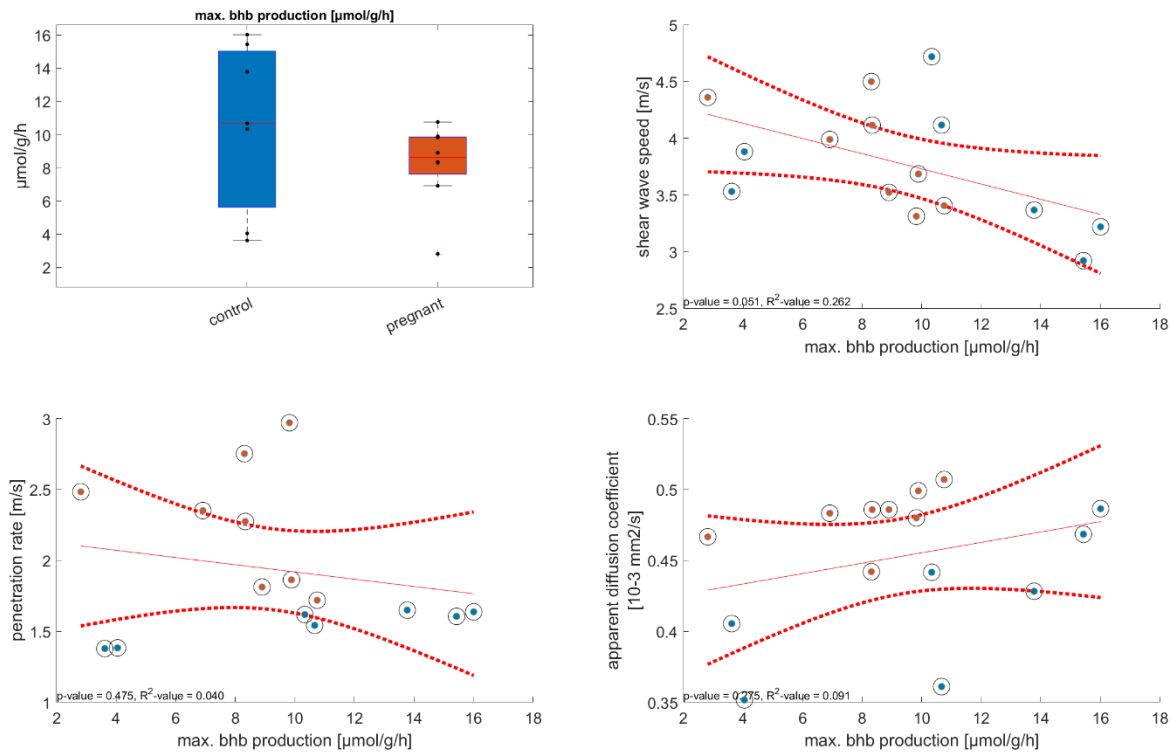
**Supplementary Fig. S3 Correlations between the biophysical properties and the metabolic functions – Maximal capacities**

The association between visco-elastic properties and the different metabolic functions was determined by a linear regression model. Linear regression fit and associated p-values for the association between visco-elastic properties ( $c$  in m/s, shear wave speed;  $a$  in m/s, penetration rate; and ADC in  $10^{-3} \text{ mm}^2/\text{s}$ , apparent diffusion coefficient) and the different metabolic functions are given below.

The differences in the metabolic functions between the control livers ( $n = 6$ ) and the livers of pregnant animals ( $n = 6$ ) are given by the box plots in the first panels. The center lines represent the median, the boxes represent the interquartile range, and the whiskers are defined by values within 1.5 times the interquartile range. Individual values for the different samples are represented as black dots. P-values are given above the brackets. Red and black brackets indicate significances with p-values  $<0.01$  and  $<0.05$ , respectively. Orange and yellow brackets indicate a tendency with p-values  $<0.1$  and  $<0.25$ , respectively. The 2<sup>nd</sup> to 4<sup>th</sup> panels show a linear regression model between the metabolic function and the visco-elastic properties. Red dotted lines indicate 95% confidence intervals of the linear model given by the solid red lines. Dots represent values of protein abundances and associated metabolic functions for individual samples (blue: control liver, orange: liver of pregnant rats). P- and  $R^2$ -values for linear regression are given in the lower right corner.

(A) Ethanol uptake

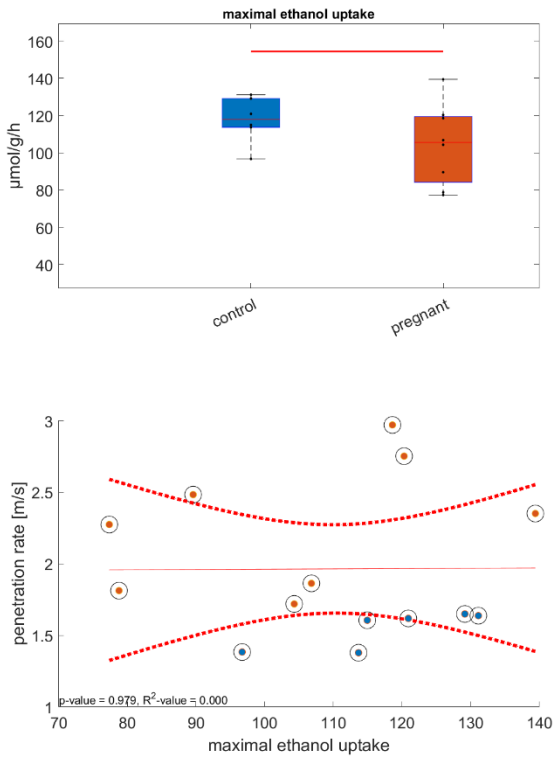

(B) Acetoacetate production

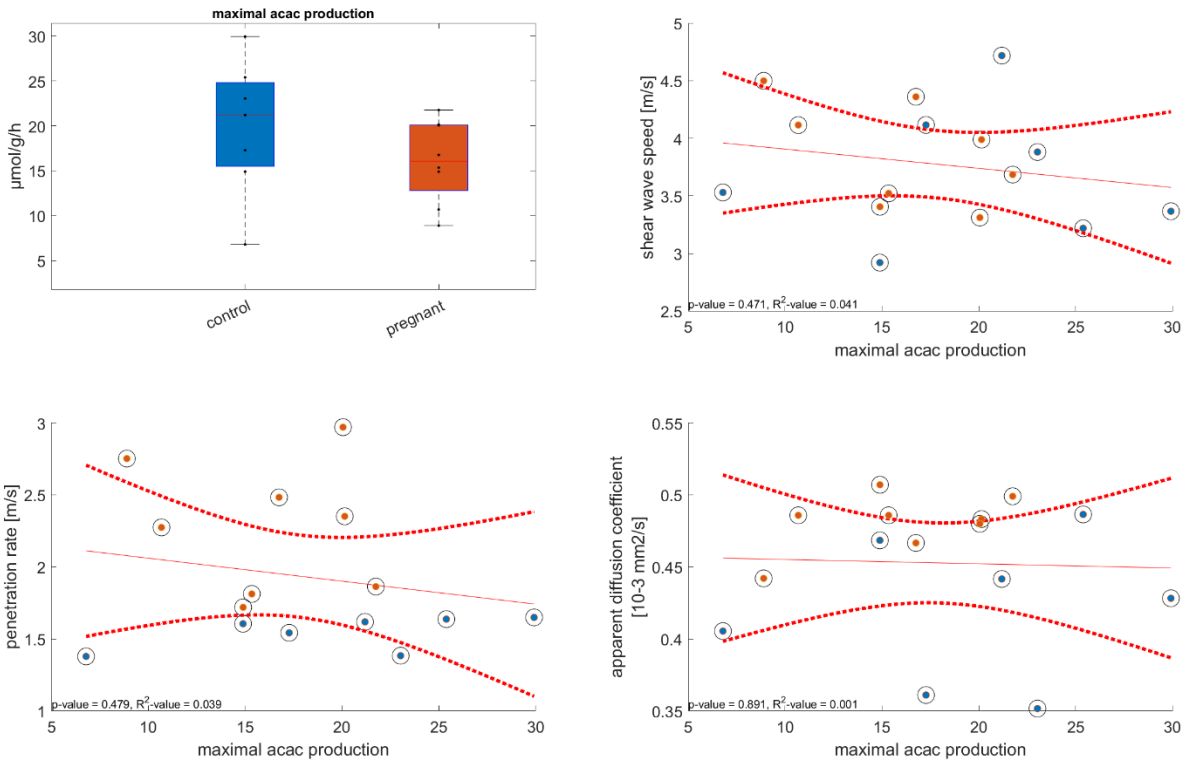



(C) Beta-hydroxybutyrate production

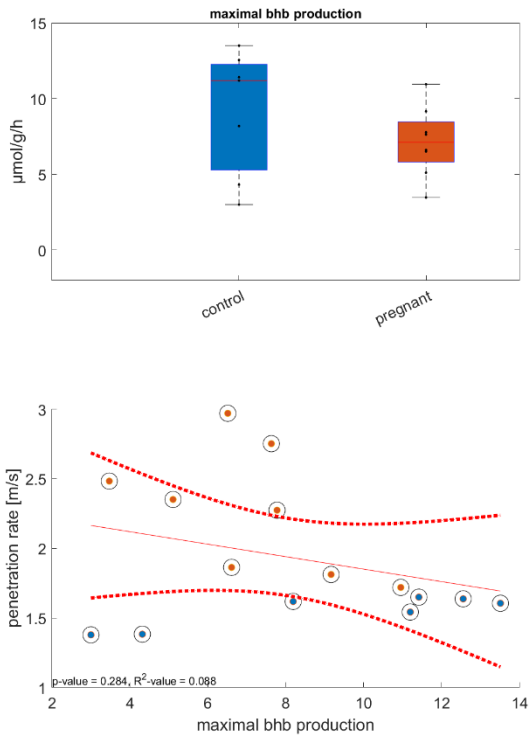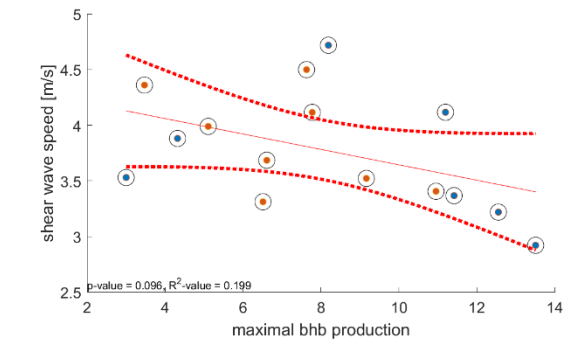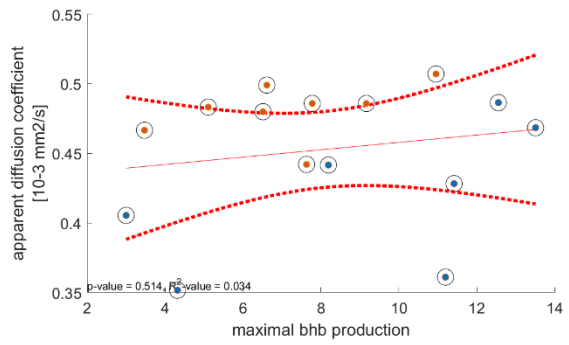

(D) Fatty acid uptake

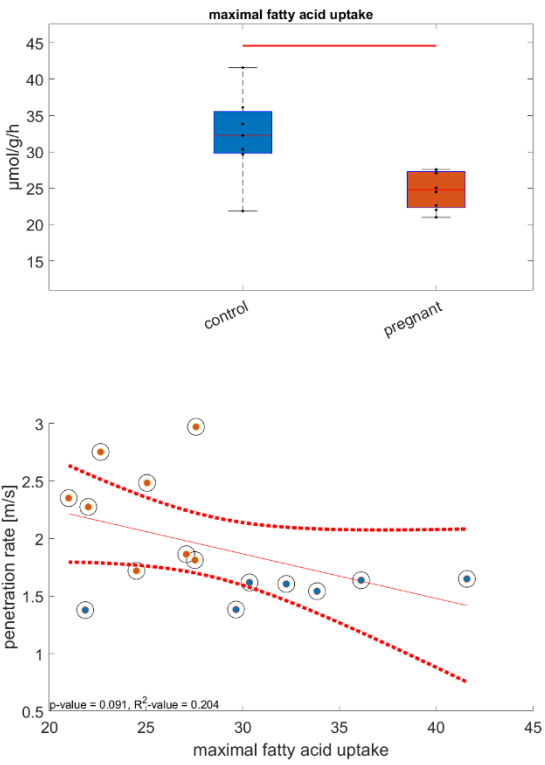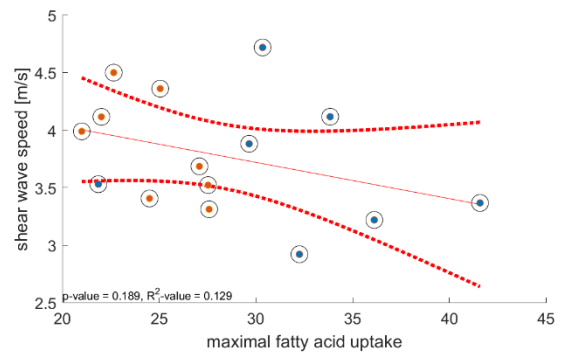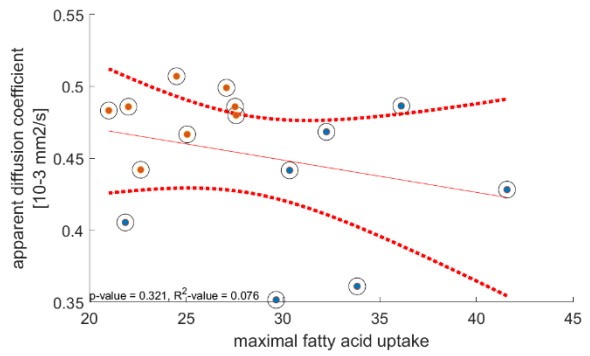

(E) Ketone body uptake

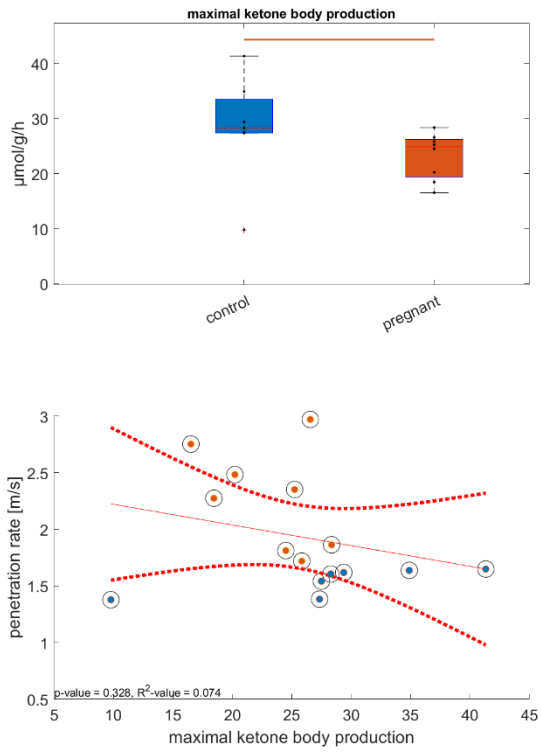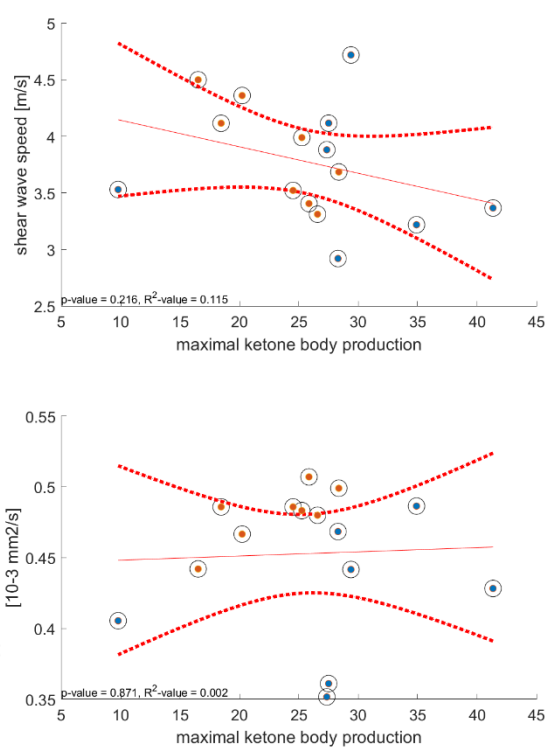

(F) TAG storage

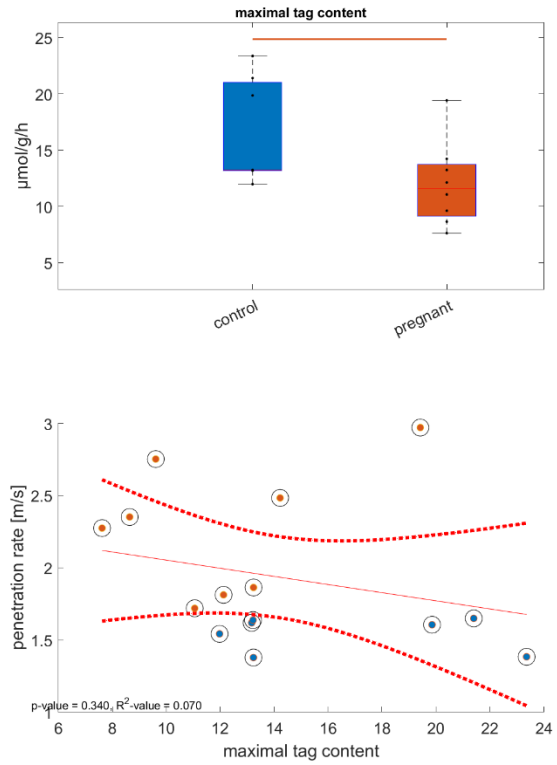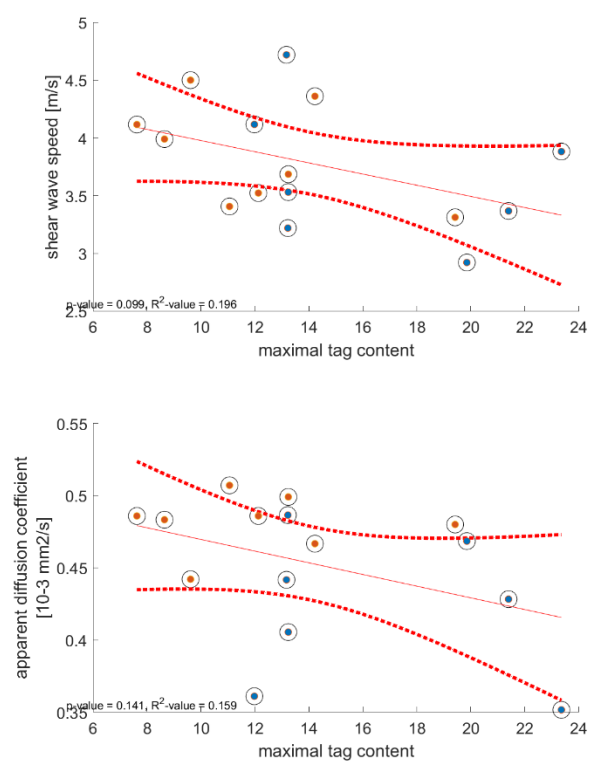

**(G) TAG synthesis**

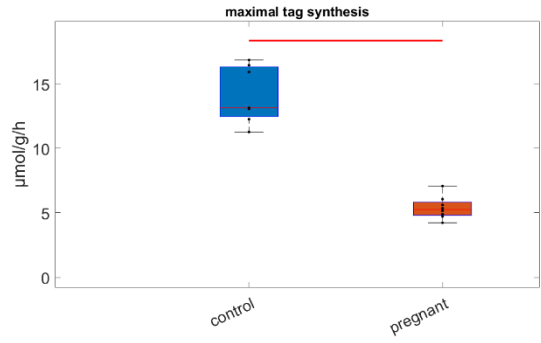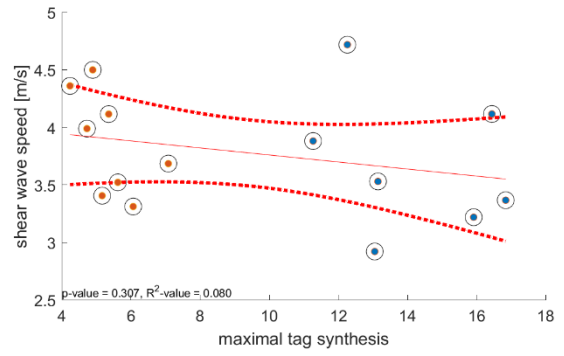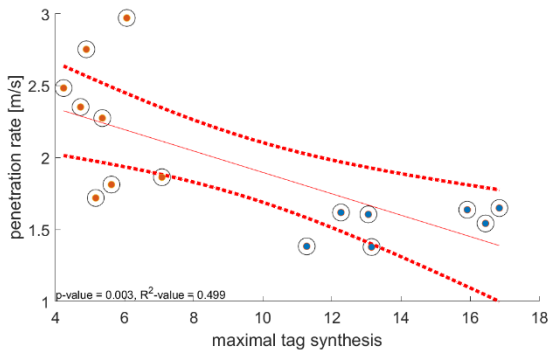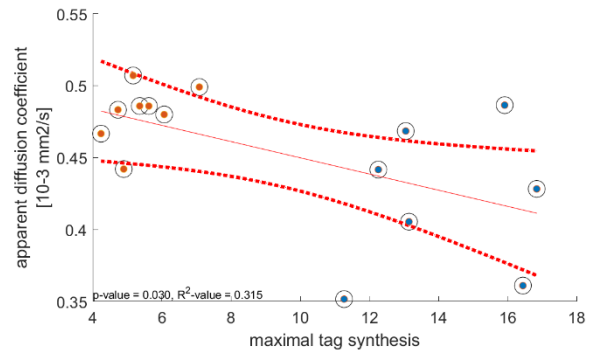

**(H) VLDL production**

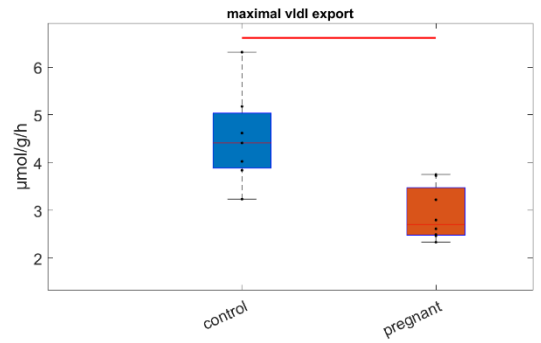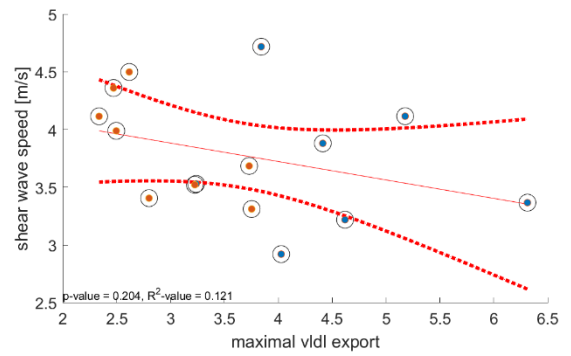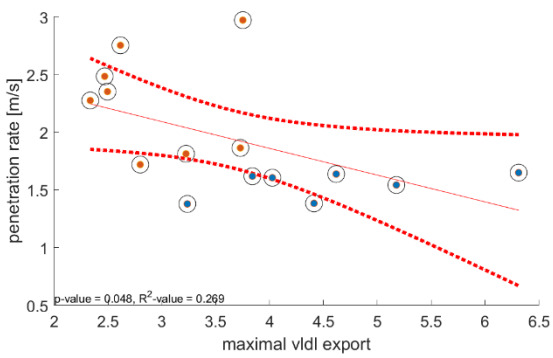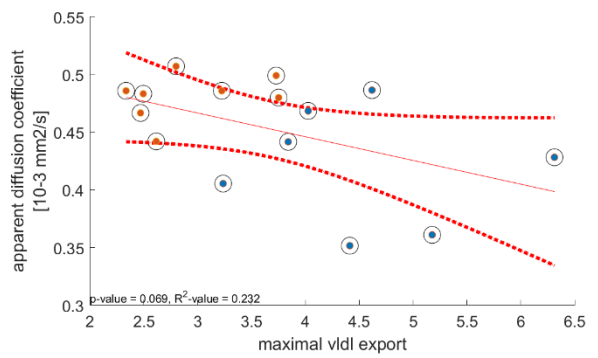

(I) Fructose uptake

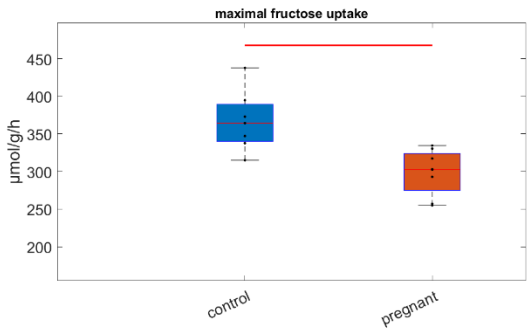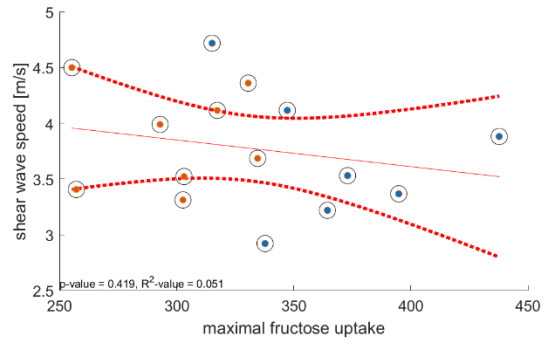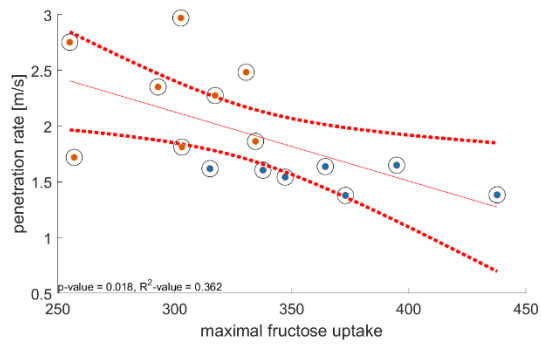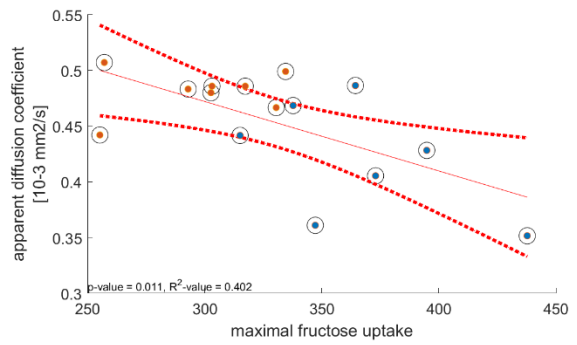

(J) Galactose uptake

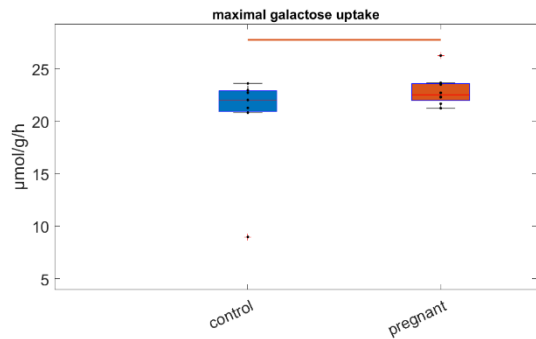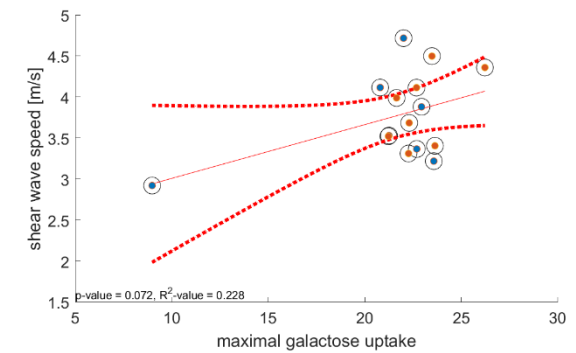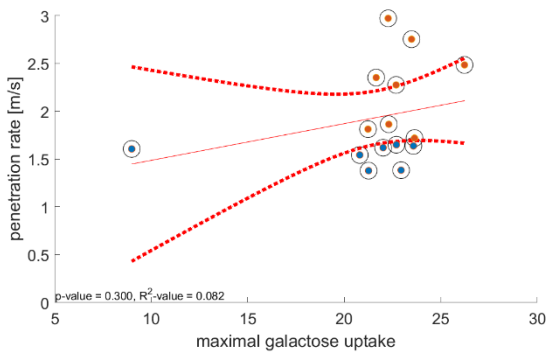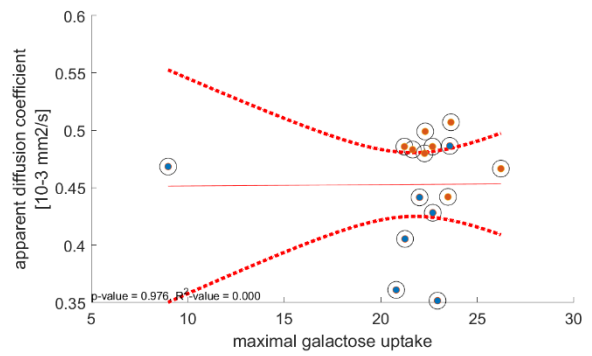

(K) Glycerol uptake

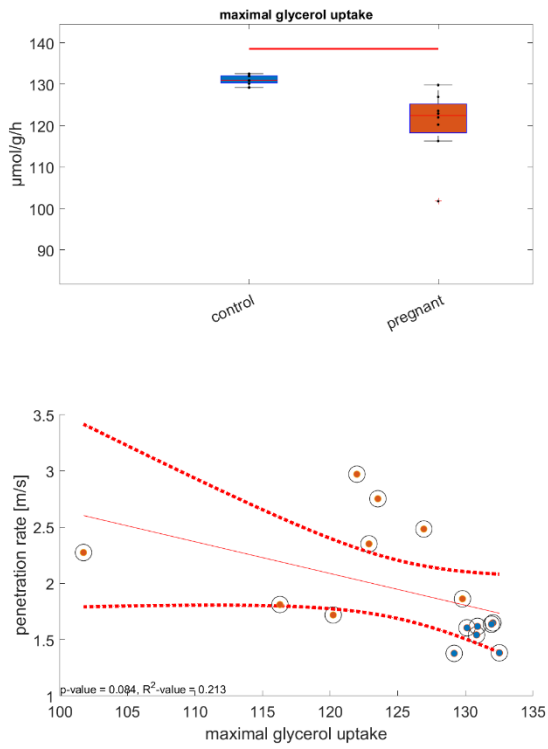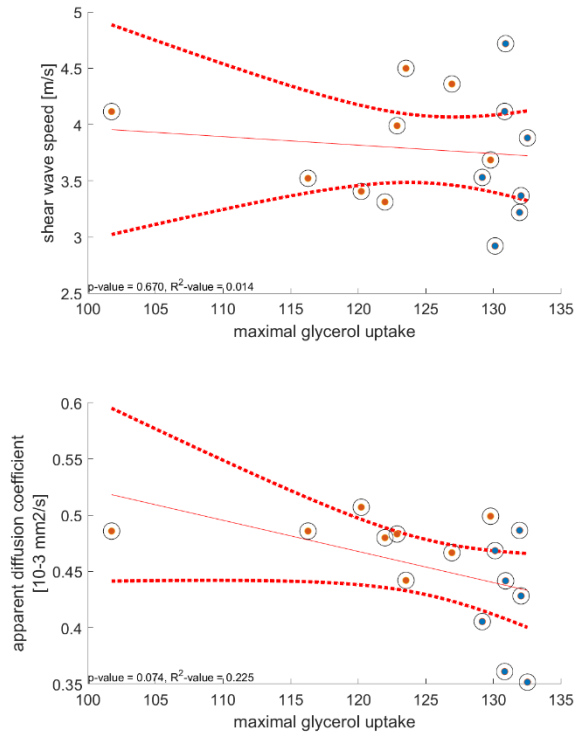

(L) Gluconeogenesis

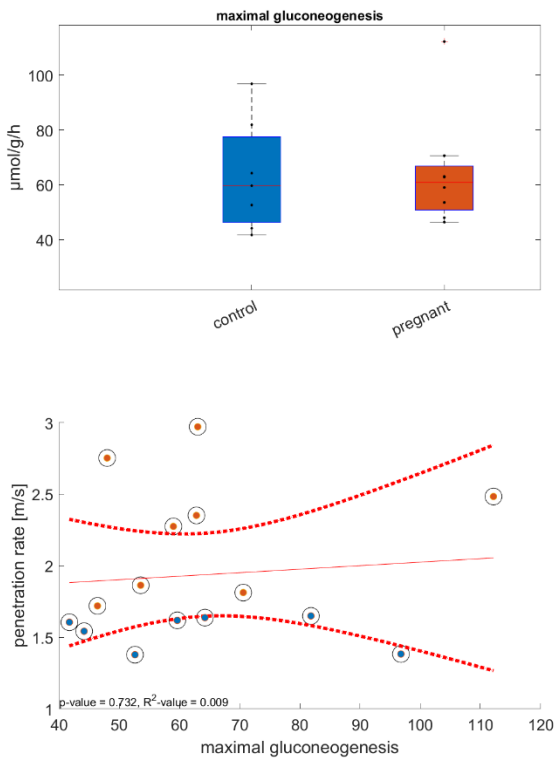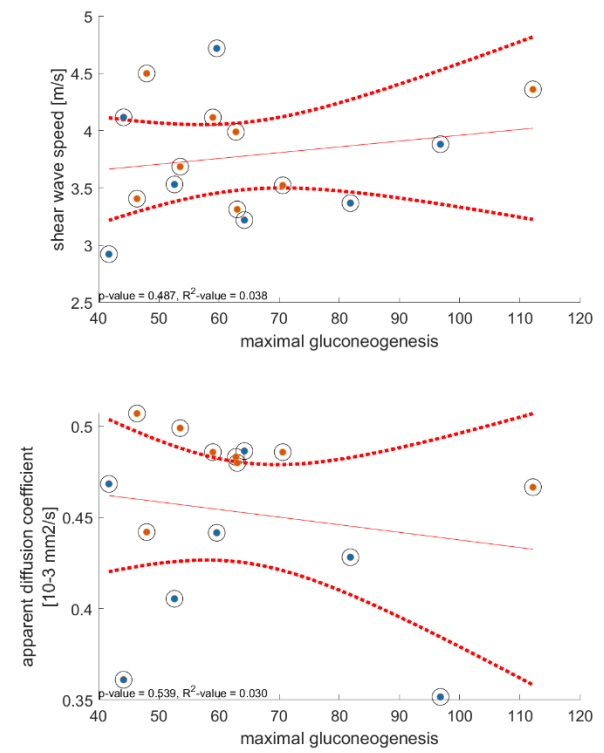

(M) Ammonia uptake

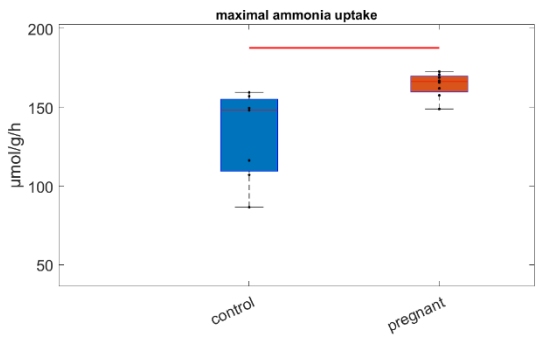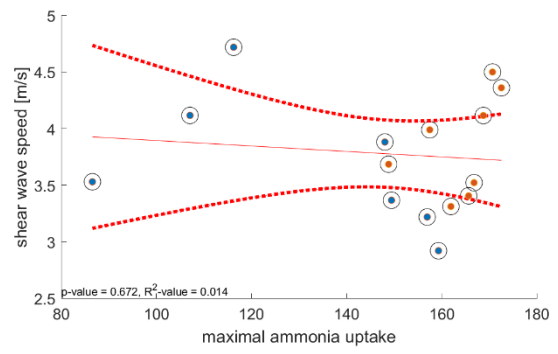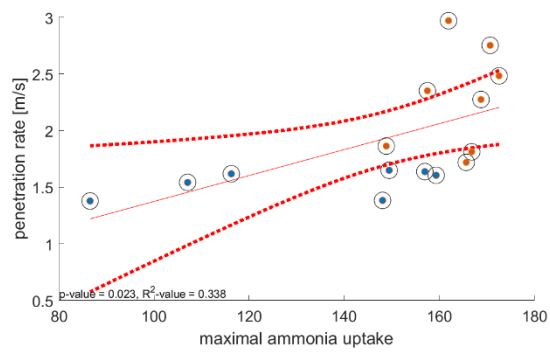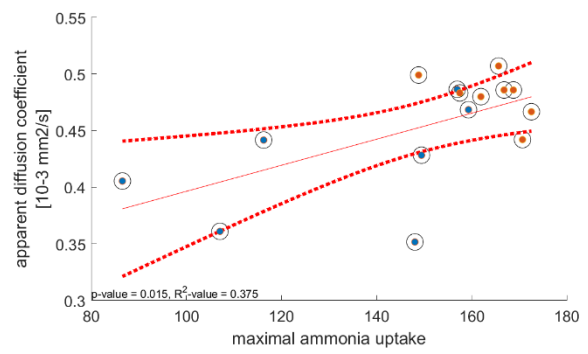

(N) Urea production

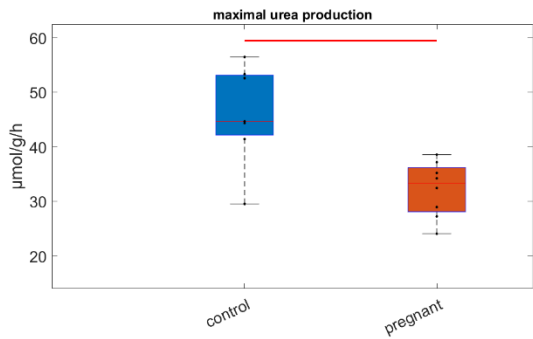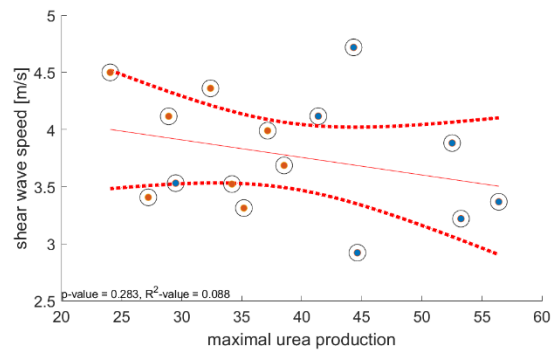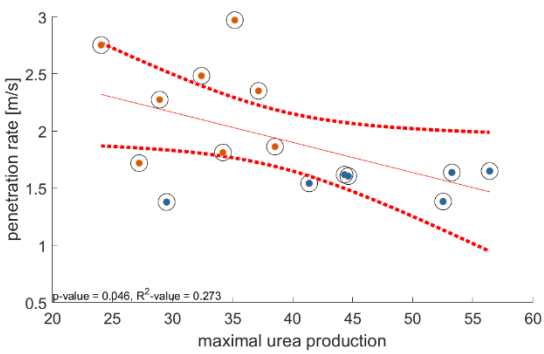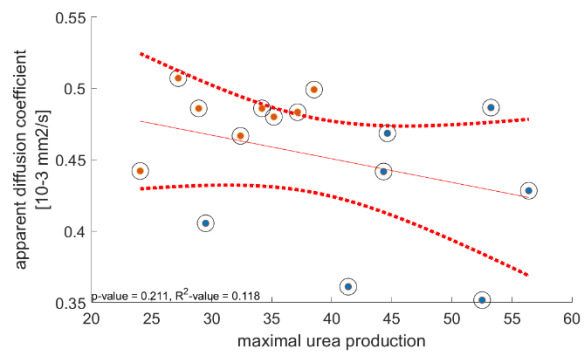

Supplement: mmc1.pdf [file mmc1.pdf]
